# Supplementary material for: Strong in vitro anticancer activity of copper(ii) and zinc(ii) complexes containing naturally occurring lapachol: cellular effects in ovarian A2780 cells
Source: Royal Society of Chemistry journal article supplement (doi:10.1039/d4md00543k), 2024-01-01
Supplement: d4md00543k1.pdf [file d4md00543k1.pdf]

## Electronic Supplementary Information (ESI)

### **Strong *in vitro* anticancer activity of copper(II) and zinc(II) complexes containing naturally occurring Lapachol: Cellular effects in ovarian A2780 cells**

Sara Stocchetti,<sup>a,b</sup> Ján Vančo,<sup>a</sup> Jan Belza,<sup>a</sup> Zdeněk Dvořák,<sup>c</sup> Zdeněk Trávníček<sup>a,\*</sup>

<sup>a</sup> Czech Advanced Technology and Research Institute, Regional Centre of Advanced Technologies and Materials, Palacký University, Šlechtitelů 27, CZ-779 00 Olomouc, Czech Republic.

<sup>b</sup> University of Pisa, Dipartimento di Chimica e Chimica Industriale, Via G. Moruzzi 13, I-56124 Pisa, Italy.

<sup>c</sup> Department of Cell Biology and Genetics, Faculty of Science, Palacký University, Šlechtitelů 27, CZ-779 00 Olomouc, Czech Republic.

*The authors would like to dedicate this work to Jan Belza, our beloved colleague and friend, who passed away unexpectedly on February 15, 2024, at the age of 31 years.*

\* Correspondence: [zdenek.travnicek@upol.cz](mailto:zdenek.travnicek@upol.cz); Tel.: +420 585 634 545.

| Table of Contents                                                                                                                                                                                                                                                                                                              | Page |
|--------------------------------------------------------------------------------------------------------------------------------------------------------------------------------------------------------------------------------------------------------------------------------------------------------------------------------|------|
| <b>Fig. S1</b> ESI-MS spectrum of complex <b>1</b> measured in MeOH using the positive ionisation mode immediately after the sample dissolution.                                                                                                                                                                               | S4   |
| <b>Fig. S1a</b> The isotopic resolved part of the ESI/MS spectra of complex <b>1</b> measured in MeOH in the region involving the peak at 636.33 <i>m/z</i> , corresponding to [Cu(Lap)(bphen)] <sup>+</sup> (the red bordered inset represents the theoretical isotopic distribution pattern for this species).               | S4   |
| <b>Fig. S1b</b> The isotopic resolved part of the ESI/MS spectra of complex <b>1</b> measured in MeOH in the region involving the peak at 727.41 <i>m/z</i> , corresponding to [Cu(bphen) <sub>2</sub> ] <sup>+</sup> (the red bordered inset represents the theoretical isotopic distribution pattern for this species).      | S5   |
| <b>Fig. S2</b> ESI-MS spectrum of complex <b>2</b> measured in MeOH using the positive ionisation mode immediately after the sample dissolution.                                                                                                                                                                               | S5   |
| <b>Fig. S2a</b> The isotopic resolved part of the ESI/MS spectra of complex <b>2</b> measured in MeOH in the region involving the peak at 498.25 <i>m/z</i> , corresponding to [Cu(Lap)(mphen)] <sup>+</sup> (the red bordered inset represents the theoretical isotopic distribution pattern for this species).               | S6   |
| <b>Fig. S3</b> ESI-MS spectrum of complex <b>3</b> measured in MeOH using the positive ionisation mode immediately after the sample dissolution.                                                                                                                                                                               | S6   |
| <b>Fig. S3a</b> The isotopic resolved part of the ESI/MS spectra of complex <b>3</b> measured in MeOH in the region involving the peak at 460.24 <i>m/z</i> , corresponding to [Cu(Lap)(bpy)] <sup>+</sup> (the red bordered inset represents the theoretical isotopic distribution pattern for this species).                 | S7   |
| <b>Fig. S4</b> ESI-MS spectrum of complex <b>4</b> measured in MeOH using the positive ionisation mode immediately after the sample dissolution.                                                                                                                                                                               | S7   |
| <b>Fig. S4a</b> The isotopic resolved part of the ESI/MS spectra of complex <b>4</b> measured in MeOH in the region involving the peak at 537.35 <i>m/z</i> , corresponding to [Cu(Lap)(terpy)] <sup>+</sup> (the red bordered inset represents the theoretical isotopic distribution pattern for this species).               | S8   |
| <b>Fig. S5</b> ESI-MS spectrum of complex <b>5</b> measured in MeOH using the positive ionisation mode immediately after the sample dissolution.                                                                                                                                                                               | S8   |
| <b>Fig. S5a</b> The isotopic resolved part of the ESI/MS spectra of complex <b>5</b> measured in MeOH in the region involving the peak at 637.37 <i>m/z</i> , corresponding to [Zn(Lap)(bphen)] <sup>+</sup> (the red bordered inset represents the theoretical isotopic distribution pattern for this species).               | S9   |
| <b>Fig. S5b</b> The isotopic resolved part of the ESI/MS spectra of complex <b>5</b> measured in MeOH in the region involving the peak at 969.59 <i>m/z</i> , corresponding to [Zn(Lap)(bphen) <sub>2</sub> ] <sup>+</sup> (the red bordered inset represents the theoretical isotopic distribution pattern for this species). | S9   |
| <b>Fig. S6</b> ESI-MS spectrum of complex <b>6</b> measured in MeOH using the positive ionisation mode immediately after the sample dissolution.                                                                                                                                                                               | S10  |
| <b>Fig. S6a</b> The isotopic resolved part of the ESI/MS spectra of complex <b>6</b> measured in MeOH in the region involving the peak at 499.29 <i>m/z</i> , corresponding to [Zn(Lap)(mphen)] <sup>+</sup> (the red bordered inset represents the theoretical isotopic distribution pattern for this species).               | S10  |
| <b>Fig. S6b</b> The isotopic resolved part of the ESI/MS spectra of complex <b>6</b> measured in MeOH in the region involving the peak at 693.39 <i>m/z</i> , corresponding to [Zn(Lap)(mphen) <sub>2</sub> ] <sup>+</sup> (the red bordered inset represents the theoretical isotopic distribution pattern for this species). | S11  |
| <b>Fig. S7</b> ESI-MS spectrum of complex <b>7</b> measured in MeOH using the positive ionisation mode immediately after the sample dissolution.                                                                                                                                                                               | S11  |
| <b>Fig. S7a</b> The isotopic resolved part of the ESI/MS spectra of complex <b>7</b> measured in MeOH in the region involving the peak at 485.27 <i>m/z</i> , corresponding to [Zn(Lap)(phen)] <sup>+</sup> (the red bordered inset                                                                                            | S12  |

|                                                                                                                                                                                                                                                                                                                                                                                                                                                            |     |
|------------------------------------------------------------------------------------------------------------------------------------------------------------------------------------------------------------------------------------------------------------------------------------------------------------------------------------------------------------------------------------------------------------------------------------------------------------|-----|
| represents the theoretical isotopic distribution pattern for this species).                                                                                                                                                                                                                                                                                                                                                                                |     |
| <b>Fig. S7b</b> The isotopic resolved part of the ESI/MS spectra of complex <b>7</b> measured in MeOH in the region involving the peak at 665.35 <i>m/z</i> , corresponding to [Zn(Lap)(phen) <sub>2</sub> ] <sup>+</sup> (the red bordered inset represents the theoretical isotopic distribution pattern for this species).                                                                                                                              | S12 |
| <b>Fig. S8</b> IR spectrum of free Lapachol (HLap).                                                                                                                                                                                                                                                                                                                                                                                                        | S13 |
| <b>Fig. S9</b> IR spectrum of complex <b>1</b> .                                                                                                                                                                                                                                                                                                                                                                                                           | S13 |
| <b>Fig. S10</b> IR spectrum of complex <b>2</b> .                                                                                                                                                                                                                                                                                                                                                                                                          | S14 |
| <b>Fig. S11</b> IR spectrum of complex <b>3</b> .                                                                                                                                                                                                                                                                                                                                                                                                          | S14 |
| <b>Fig. S12</b> IR spectrum of complex <b>4</b> .                                                                                                                                                                                                                                                                                                                                                                                                          | S15 |
| <b>Fig. S13</b> IR spectrum of complex <b>5</b> .                                                                                                                                                                                                                                                                                                                                                                                                          | S15 |
| <b>Fig. S14</b> IR spectrum of complex <b>6</b> .                                                                                                                                                                                                                                                                                                                                                                                                          | S16 |
| <b>Fig. S15</b> IR spectrum of complex <b>7</b> .                                                                                                                                                                                                                                                                                                                                                                                                          | S16 |
| <b>Fig. S16</b> Electronic spectra of complex <b>1</b> measured in the solid state (red solid line) and MeOH (red dashed line).                                                                                                                                                                                                                                                                                                                            | S17 |
| <b>Fig. S17</b> ESI-MS spectrum of complex <b>1</b> measured in MeOH:H <sub>2</sub> O (1:1) using the positive ionisation mode immediately after the sample preparation.                                                                                                                                                                                                                                                                                   | S17 |
| <b>Fig. S18</b> ESI-MS spectrum of complex <b>1</b> measured in MeOH:H <sub>2</sub> O (1:1) using the positive ionisation mode 24 h after the sample preparation.                                                                                                                                                                                                                                                                                          | S18 |
| <b>Fig. S19</b> ESI-MS spectrum of complex <b>5</b> measured in MeOH:H <sub>2</sub> O (1:1) using the positive ionisation mode immediately after the sample preparation.                                                                                                                                                                                                                                                                                   | S18 |
| <b>Fig. S20</b> ESI-MS spectrum of complex <b>5</b> measured in MeOH:H <sub>2</sub> O (1:1) using the positive ionisation mode 24 h after the sample preparation.                                                                                                                                                                                                                                                                                          | S19 |
| <b>Table S1</b> Crystal data and structure refinements for <b>4</b> , <b>5</b> , and <b>6</b>                                                                                                                                                                                                                                                                                                                                                              | S20 |
| <b>Fig. S21</b> The O–H...O hydrogen bonds (cyan dashed lines) connect centrosymmetrically two individual molecules of <b>4</b> through the nitrate anions.                                                                                                                                                                                                                                                                                                | S21 |
| <b>Table S2</b> Parameters of selected hydrogen bonds [Å and °] in complex <b>4</b> .                                                                                                                                                                                                                                                                                                                                                                      | S21 |
| <b>Fig. S22</b> Part of the crystal structure of <b>5</b> , showing the C–H...C and C–H...O non-covalent contacts (red dotted lines) connecting individual molecules of <b>5</b> into a 3D structure.                                                                                                                                                                                                                                                      | S22 |
| <b>Table S3</b> Parameters of selected hydrogen bonds [Å and °] in complex <b>5</b> .                                                                                                                                                                                                                                                                                                                                                                      | S22 |
| <b>Fig. S23</b> Part of the crystal structure of <b>6</b> , showing the C–H...C, C–H...O (red dotted lines) and C...O (cyan dotted lines) non-covalent contacts, connecting individual molecules of <b>6</b> into a 3D structure.                                                                                                                                                                                                                          | S23 |
| <b>Table S4</b> Parameters of selected hydrogen bonds [Å and °] for complex <b>6</b> .                                                                                                                                                                                                                                                                                                                                                                     | S23 |
| <b>Fig. S24</b> The cyclic-voltammograms of complexes <b>2</b> , <b>3</b> , <b>5</b> , and ligand lapachol measured at 0.1 mM concentration in CH <sub>2</sub> Cl <sub>2</sub> containing 0.1 M Bu <sub>4</sub> NPF <sub>6</sub> as a supporting electrolyte using the Gamry Series G300 potentiostat (Gamry Instruments, Warminster, PA, USA) equipped with platinum foil working and counter electrode and Ag/AgCl in saturated KOH reference electrode. | S24 |
| <b>Table S5</b> The potentials (V) of the maxima/shoulders of the anodic and cathodic waves ( <i>E</i> <sub>pa</sub> - anodic, <i>E</i> <sub>pc</sub> - cathodic) vs. reference electrode Ag/AgCl in saturated KOH. The values were obtained by the analysis of the raw data using the Gamry Echem Analyst software (ver. 6.33).                                                                                                                           | S24 |

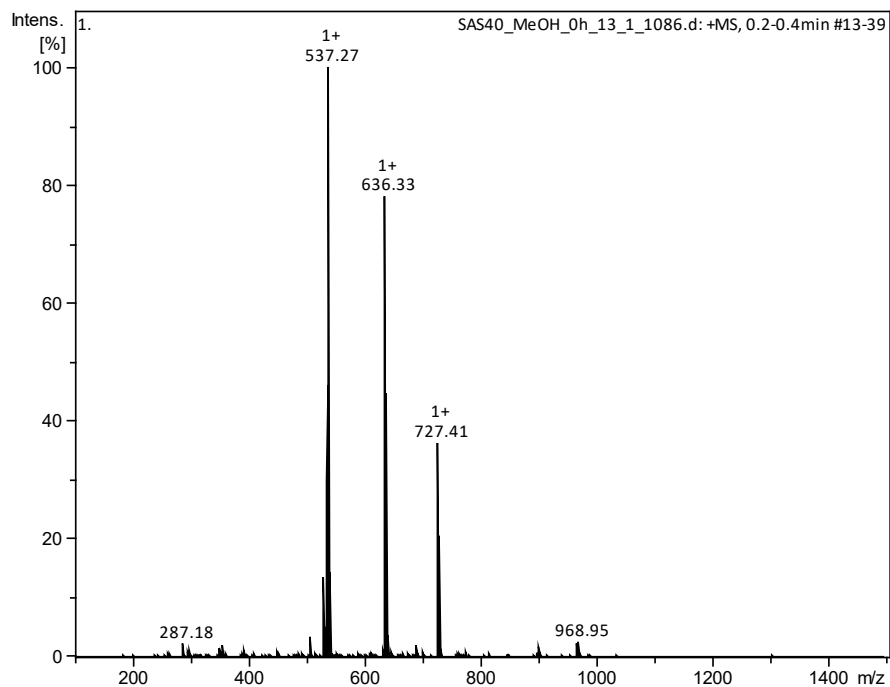

**Fig. S1** ESI-MS spectrum of complex **1** measured in MeOH using the positive ionisation mode immediately after the sample dissolution. The main peaks represent the following pseudomolecular ions (theor. monoisotopic mass): 636.33  $m/z$   $[\text{Cu}(\text{Lap})(\text{bphen})]^+$  (636.15); 727.41  $m/z$   $[\text{Cu}(\text{bphen})_2]^+$  (727.19).

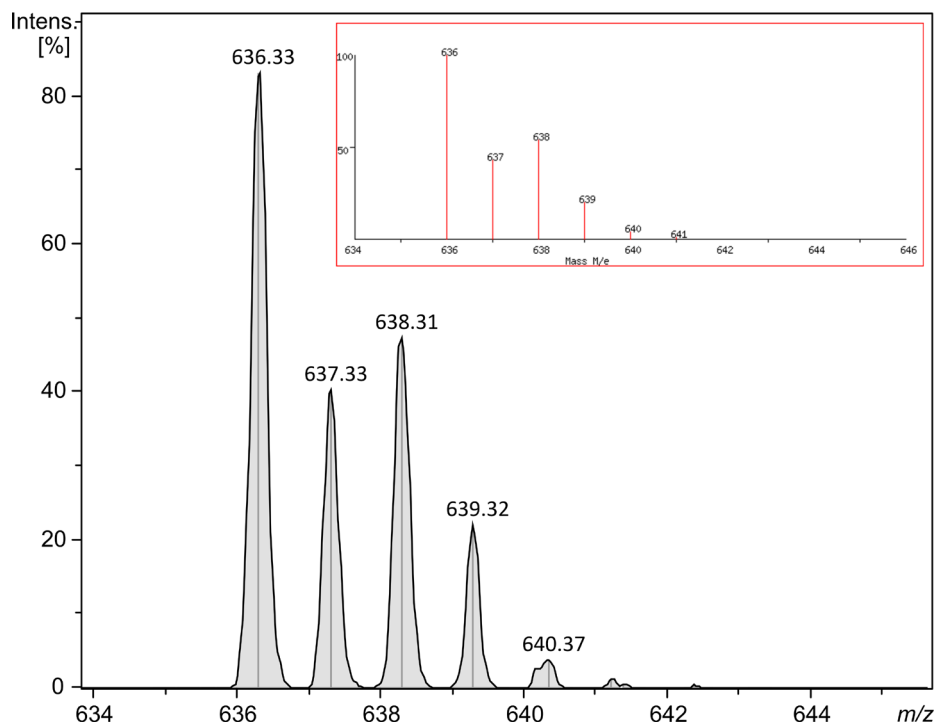

**Fig. S1a** The isotopically resolved part of the ESI/MS spectra of complex **1** measured in MeOH in the region involving the peak at 636.33  $m/z$ , corresponding to  $[\text{Cu}(\text{Lap})(\text{bphen})]^+$  (the red bordered inset represents the theoretical isotopic distribution pattern for this species).

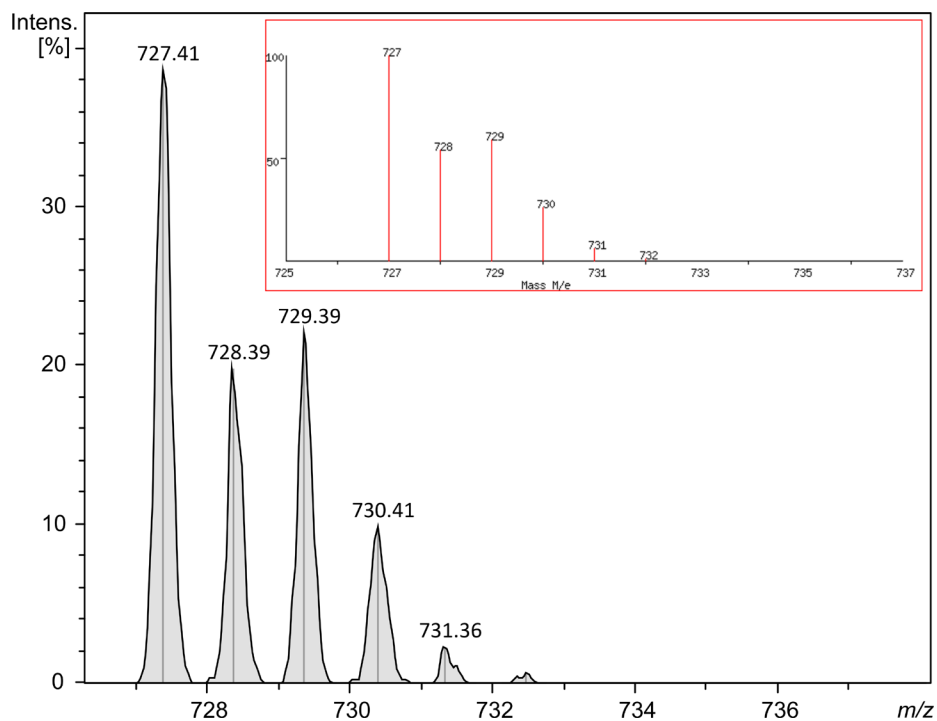

**Fig. S1b** The isotopically resolved part of the ESI/MS spectra of complex **1** measured in MeOH in the region involving the peak at  $727.41\ m/z$ , corresponding to  $[\text{Cu}(\text{bphen})_2]^+$  (the red bordered inset represents the theoretical isotopic distribution pattern for this species).

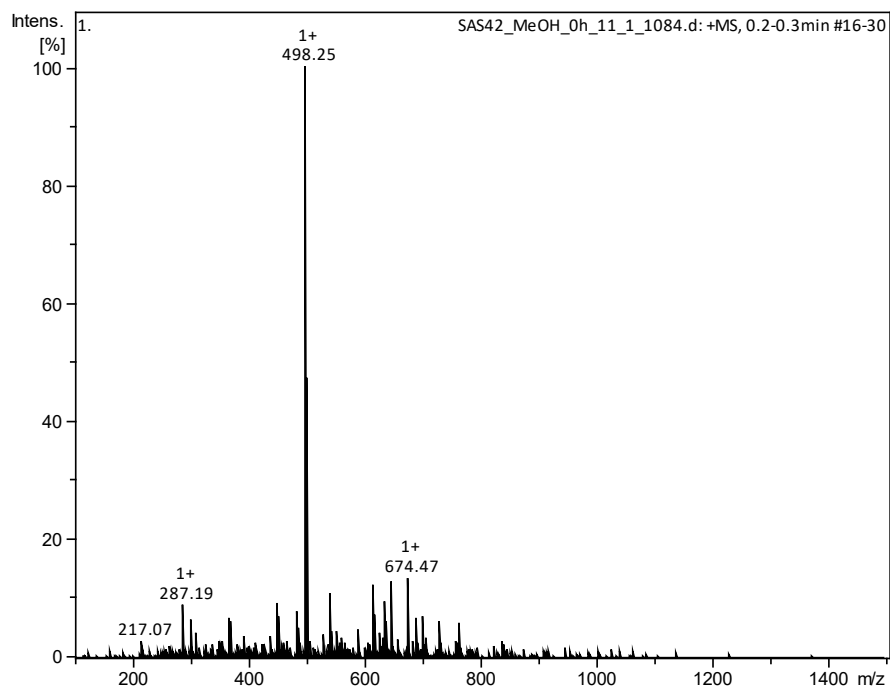

**Fig. S2** ESI-MS spectrum of complex **2** measured in MeOH using the positive ionisation mode immediately after the sample dissolution. The main peak represents the following pseudomolecular ion (theor. monoisotopic mass):  $498.25\ m/z$   $[\text{Cu}(\text{Lap})(\text{mphen})]^+$  (498.10).

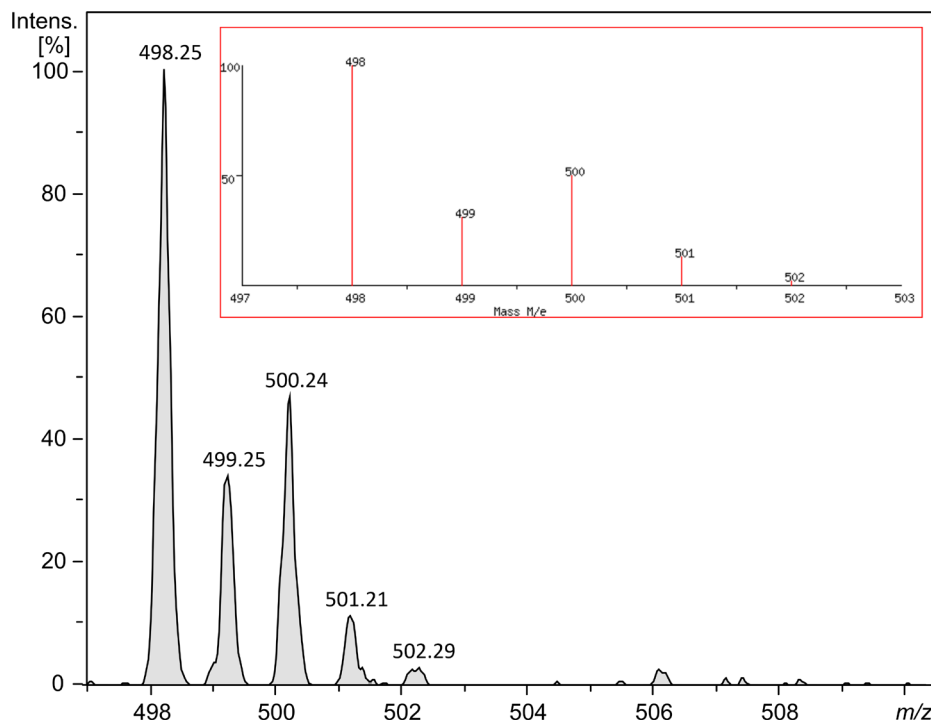

**Fig. S2a** The isotopic resolved part of the ESI/MS spectra of complex **2** measured in MeOH in the region involving the peak at 498.25 *m/z*, corresponding to [Cu(Lap)(mphēn)]<sup>+</sup> (the red bordered inset represents the theoretical isotopic distribution pattern for this species).

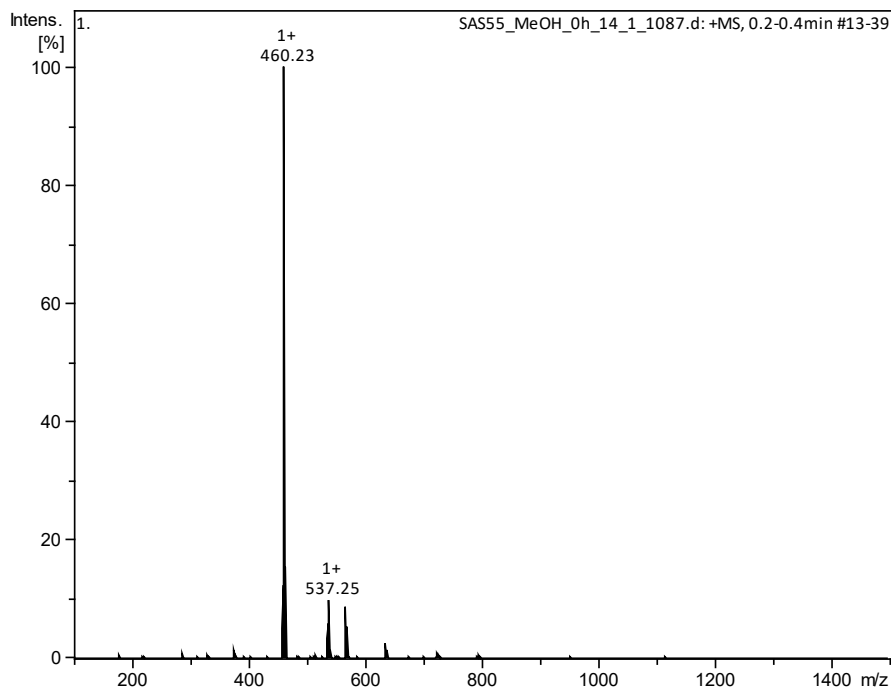

**Fig. S3** ESI-MS spectrum of complex **3** measured in MeOH using the positive ionisation mode immediately after the sample dissolution. The main peak represents the following pseudomolecular ion (theor. monoisotopic mass): 460.23 *m/z* [Cu(Lap)(bpy)]<sup>+</sup> (460.08).

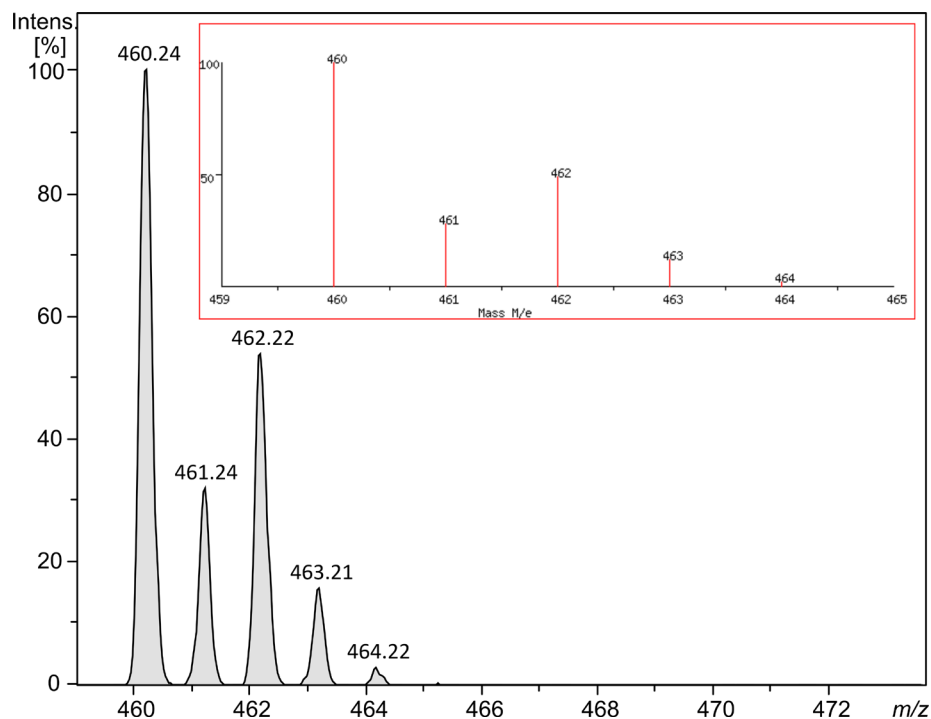

**Fig. S3a** The isotopic resolved part of the ESI/MS spectra of complex **3** measured in MeOH in the region involving the peak at 460.24  $m/z$ , corresponding to  $[\text{Cu}(\text{Lap})(\text{bpy})]^+$  (the red bordered inset represents the theoretical isotopic distribution pattern for this species).

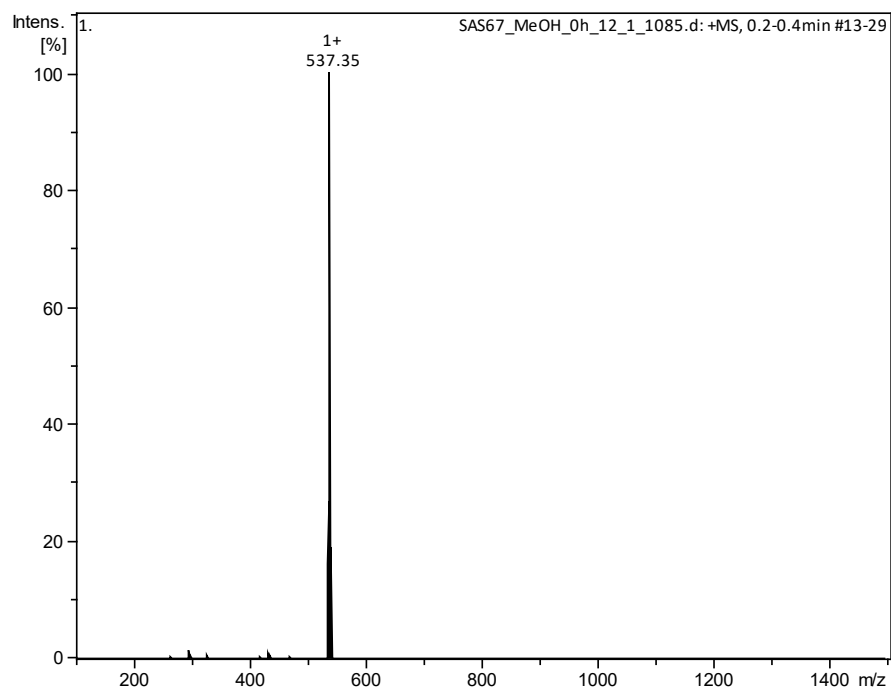

**Fig. S4** ESI-MS spectrum of complex **4** measured in MeOH using the positive ionisation mode immediately after the sample dissolution. The main peak represents the following pseudomolecular ion (theor. monoisotopic mass): 537.35  $m/z$   $[\text{Cu}(\text{Lap})(\text{terpy})]^+$  (537.11).

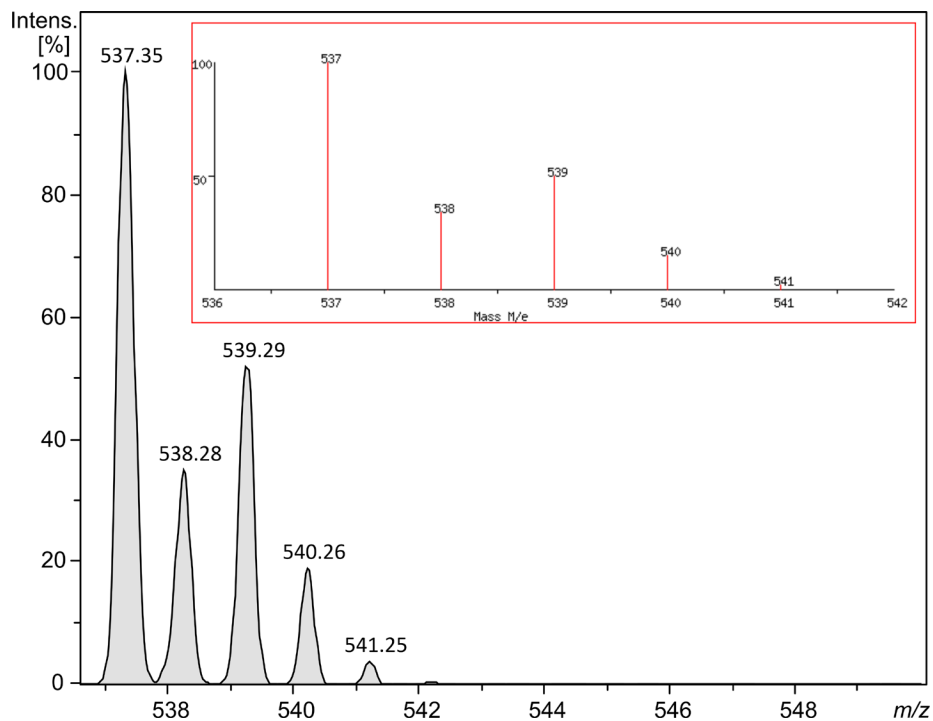

**Fig. S4a** The isotopic resolved part of the ESI/MS spectra of complex **4** measured in MeOH in the region involving the peak at 537.35  $m/z$ , corresponding to  $[\text{Cu}(\text{Lap})(\text{terpy})]^+$  (the red bordered inset represents the theoretical isotopic distribution pattern for this species).

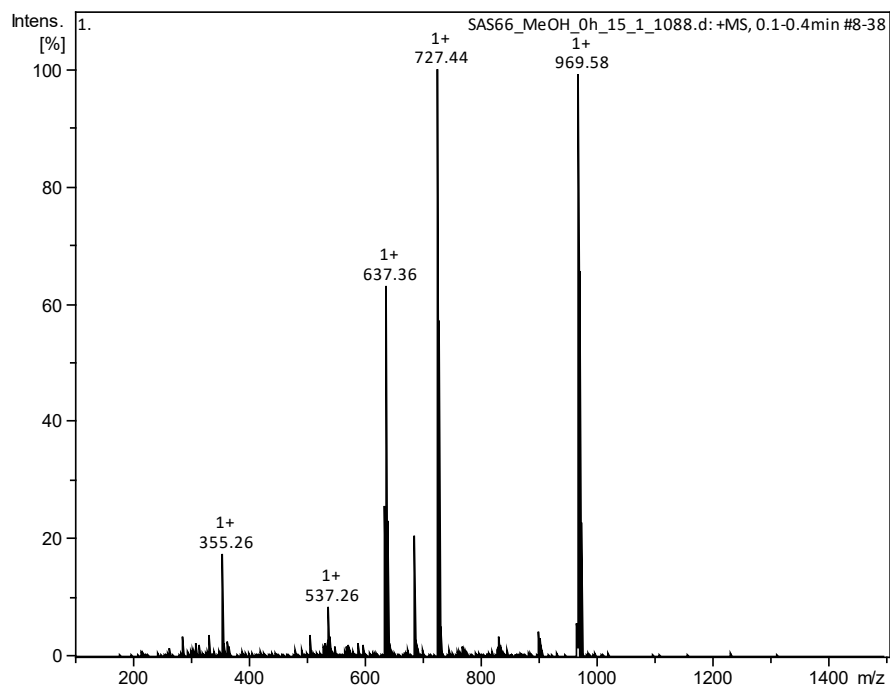

**Fig. S5** ESI-MS spectrum of complex **5** measured in MeOH using the positive ionisation mode immediately after the sample dissolution. The main peaks represent the following pseudomolecular ions (theor. monoisotopic mass): 637.36  $m/z$   $[\text{Zn}(\text{Lap})(\text{bphen})]^+$  (637.15); 969.58  $m/z$   $[\text{Zn}(\text{Lap})(\text{bphen})_2]^+$  (969.28).



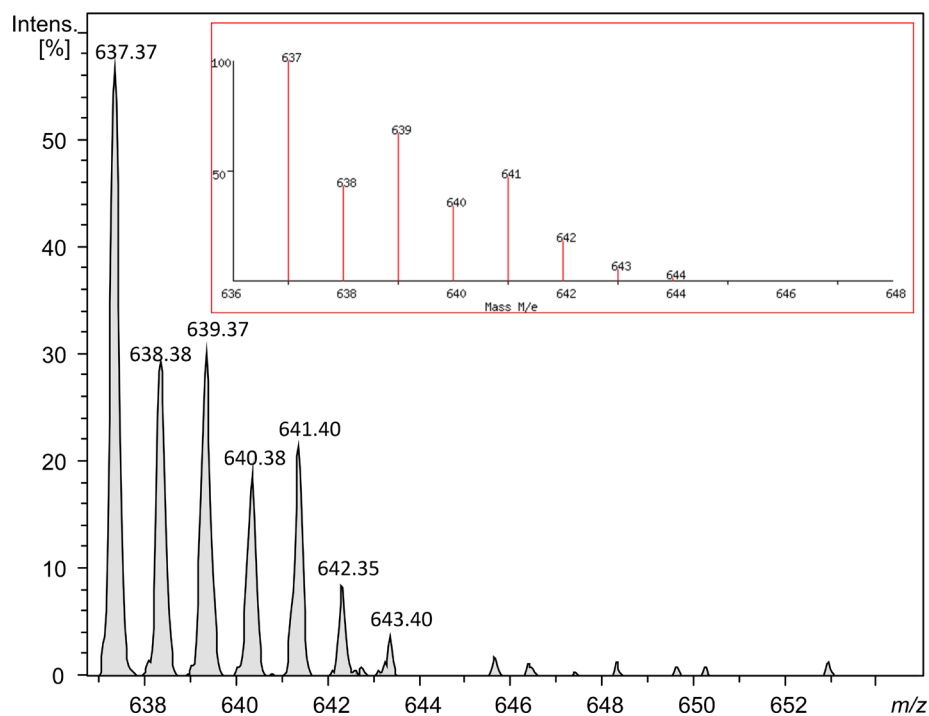

**Fig. S5a** The isotopic resolved part of the ESI/MS spectra of complex **5** measured in MeOH in the region involving the peak at 637.37  $m/z$ , corresponding to  $[\text{Zn}(\text{Lap})(\text{bphen})]^+$  (the red bordered inset represents the theoretical isotopic distribution pattern for this species).

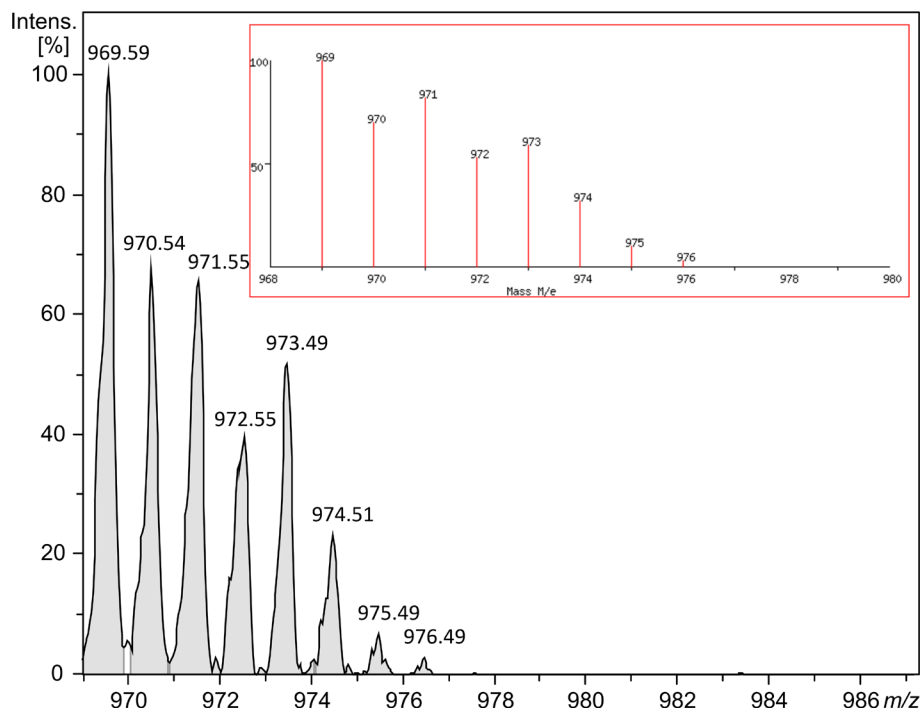

**Fig. S5b** The isotopic resolved part of the ESI/MS spectra of complex **5** measured in MeOH in the region involving the peak at 969.59  $m/z$ , corresponding to  $[\text{Zn}(\text{Lap})(\text{bphen})_2]^+$  (the red bordered inset represents the theoretical isotopic distribution pattern for this species).

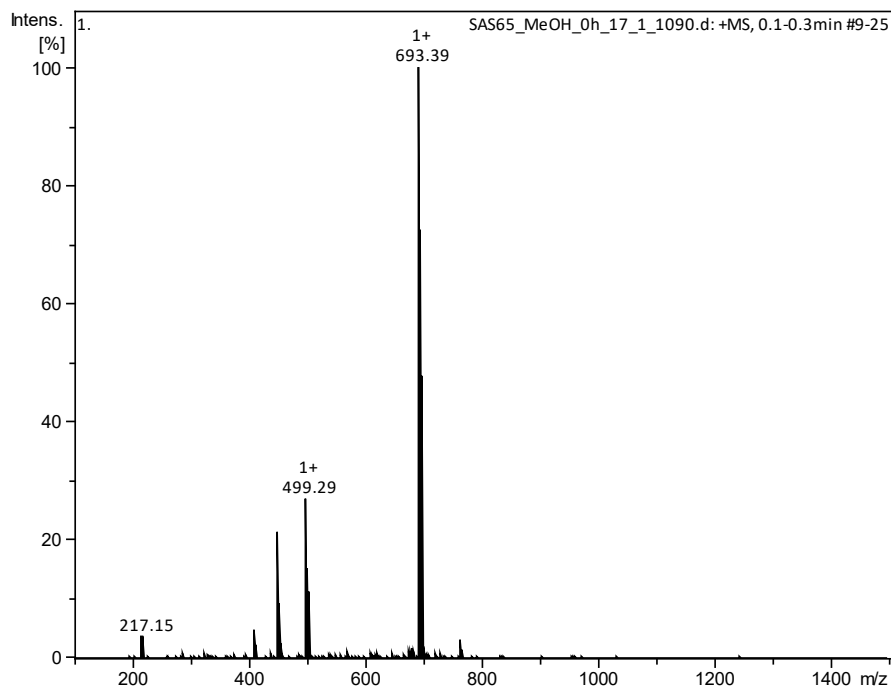

**Fig. S6** ESI-MS spectrum of complex **6** measured in MeOH using the positive ionisation mode immediately after the sample dissolution. The main peaks represent the following pseudomolecular ions (theor. monoisotopic mass): 499.29  $m/z$   $[\text{Zn}(\text{Lap})(\text{mphen})]^+$  (499.10); 693.39  $m/z$   $[\text{Zn}(\text{mphen})_2]^+$  (693.18).

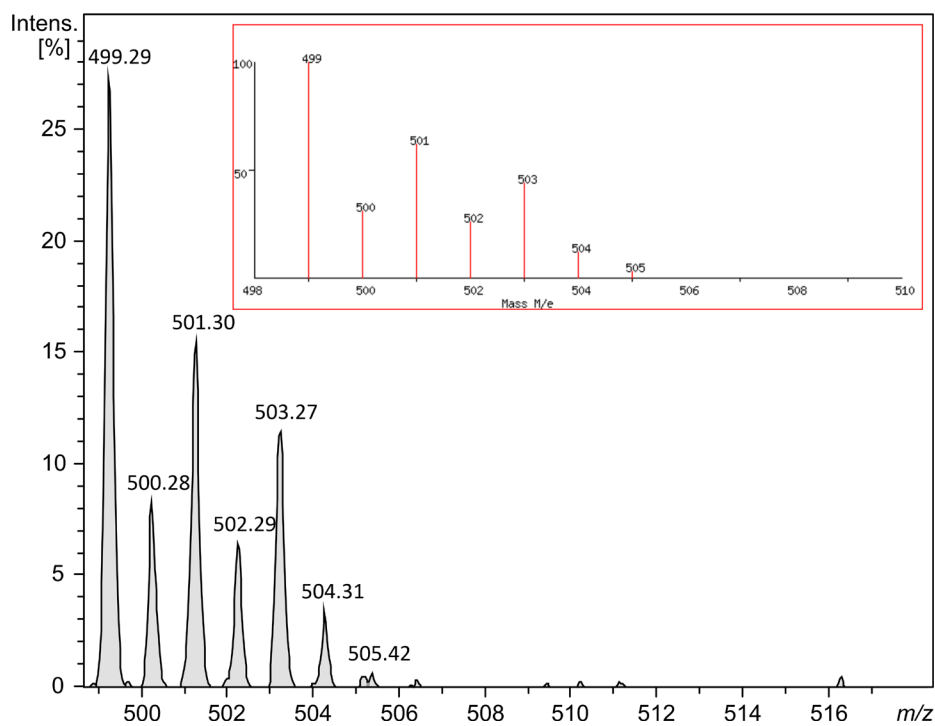

**Fig. S6a** The isotopic resolved part of the ESI/MS spectra of complex **6** measured in MeOH in the region involving the peak at 499.29  $m/z$ , corresponding to  $[\text{Zn}(\text{Lap})(\text{mphen})]^+$  (the red bordered inset represents the theoretical isotopic distribution pattern for this species).

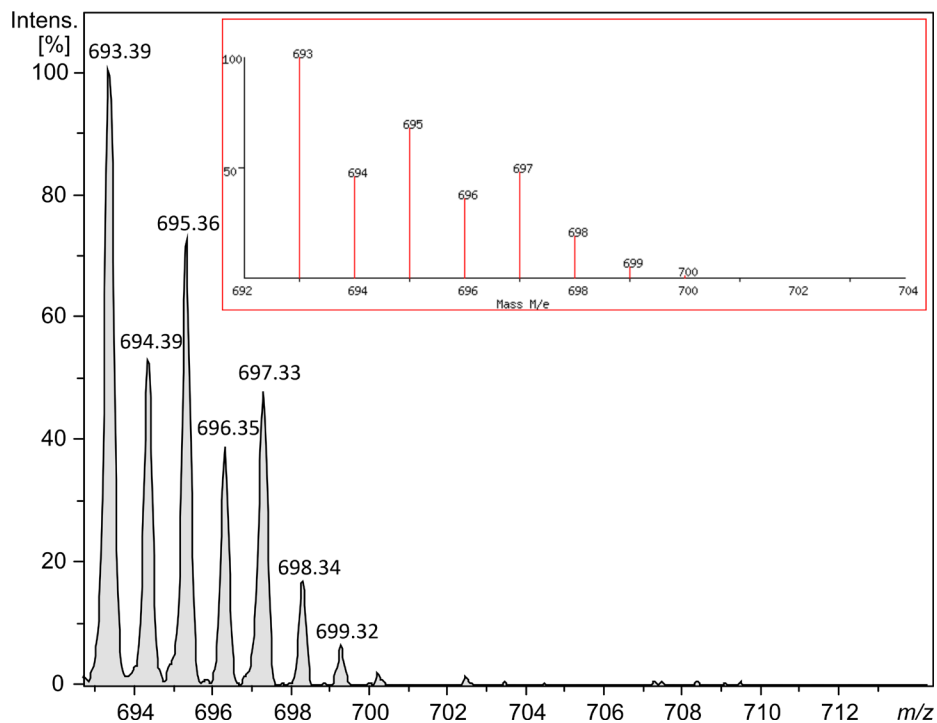

**Fig. S6b** The isotopic resolved part of the ESI/MS spectra of complex **6** measured in MeOH in the region involving the peak at 693.39  $m/z$ , corresponding to  $[\text{Zn}(\text{Lap})(\text{mphēn})_2]^+$  (the red bordered inset represents the theoretical isotopic distribution pattern for this species).

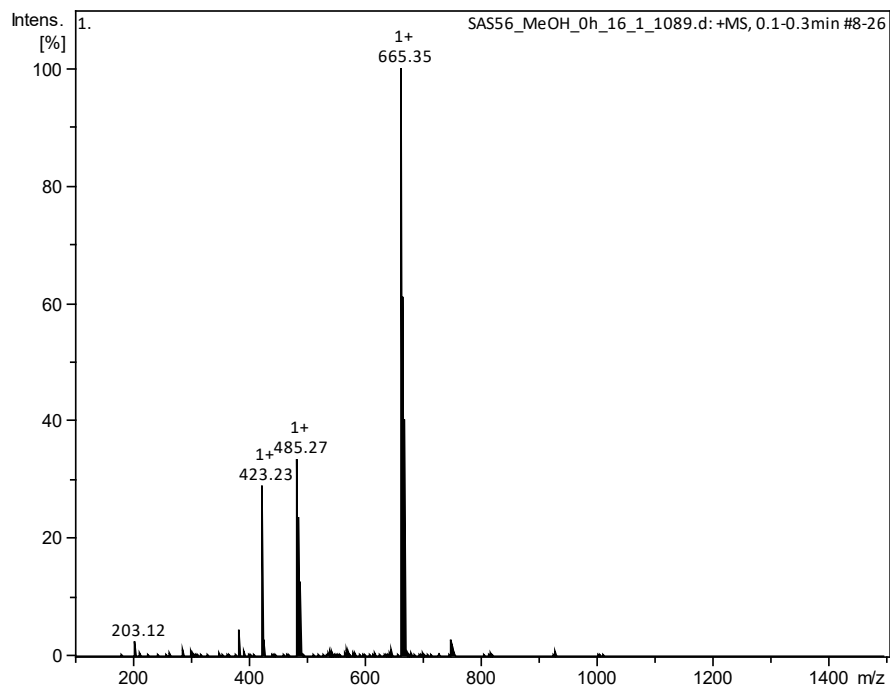

**Fig. S7** ESI-MS spectrum of complex **7** measured in MeOH using the positive ionisation mode immediately after the sample dissolution. The main peaks represent the following pseudomolecular ions (theor. monoisotopic mass): 485.27  $m/z$   $[\text{Zn}(\text{Lap})(\text{phen})]^+$  (485.08); 665.35  $m/z$   $[\text{Zn}(\text{Lap})(\text{phen})_2]^+$  (665.15).

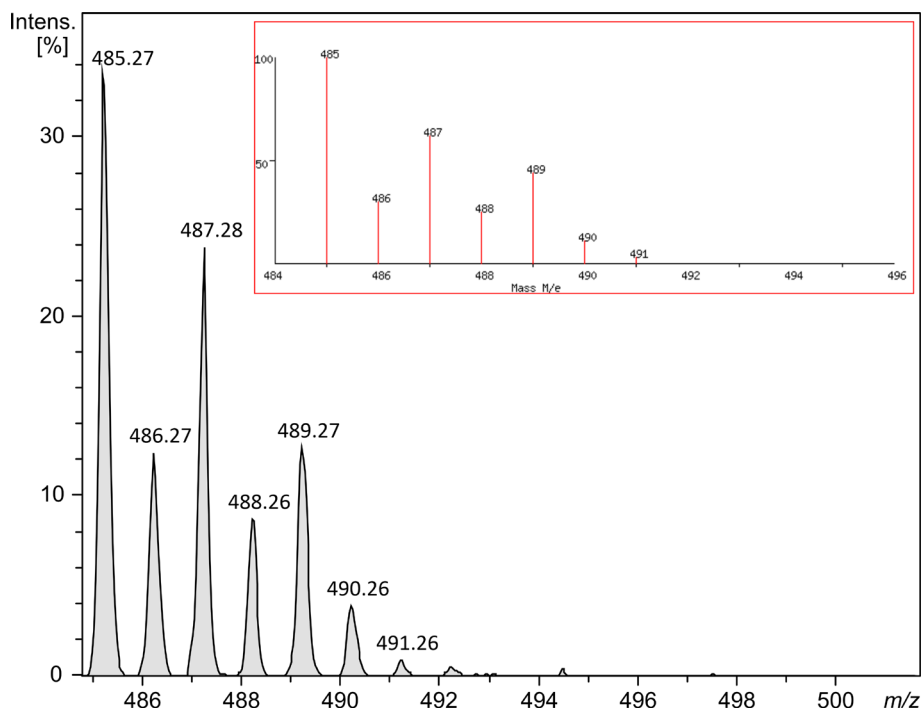

**Fig. S7a** The isotopic resolved part of the ESI/MS spectra of complex 7 measured in MeOH in the region involving the peak at 485.27  $m/z$ , corresponding to  $[\text{Zn}(\text{Lap})(\text{phen})]^+$  (the red bordered inset represents the theoretical isotopic distribution pattern for this species).

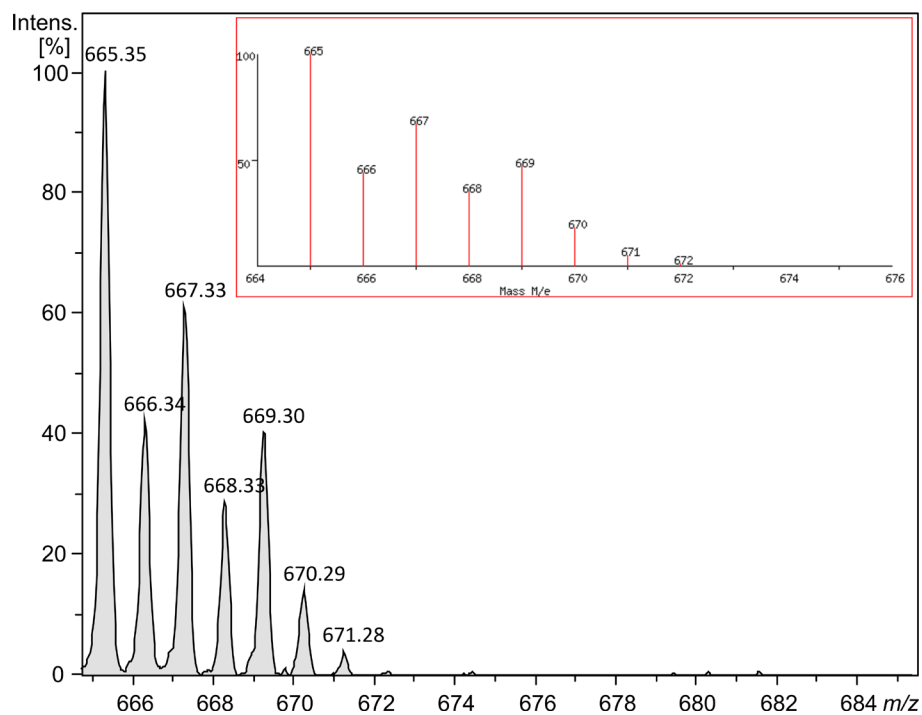

**Fig. S7b** The isotopic resolved part of the ESI/MS spectra of complex 7 measured in MeOH in the region involving the peak at 665.35  $m/z$ , corresponding to  $[\text{Zn}(\text{Lap})(\text{phen})_2]^+$  (the red bordered inset represents the theoretical isotopic distribution pattern for this species).

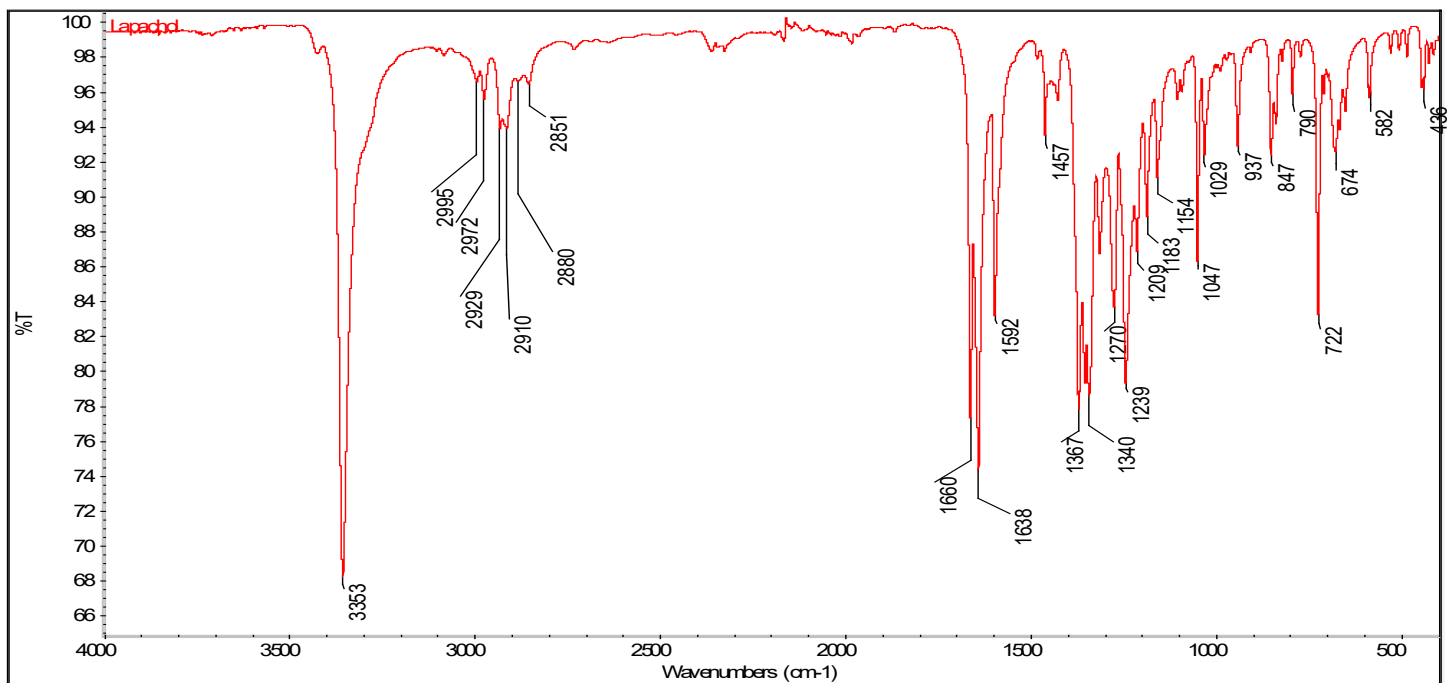

Fig. S8 IR spectrum of free Lapachol (HLap).

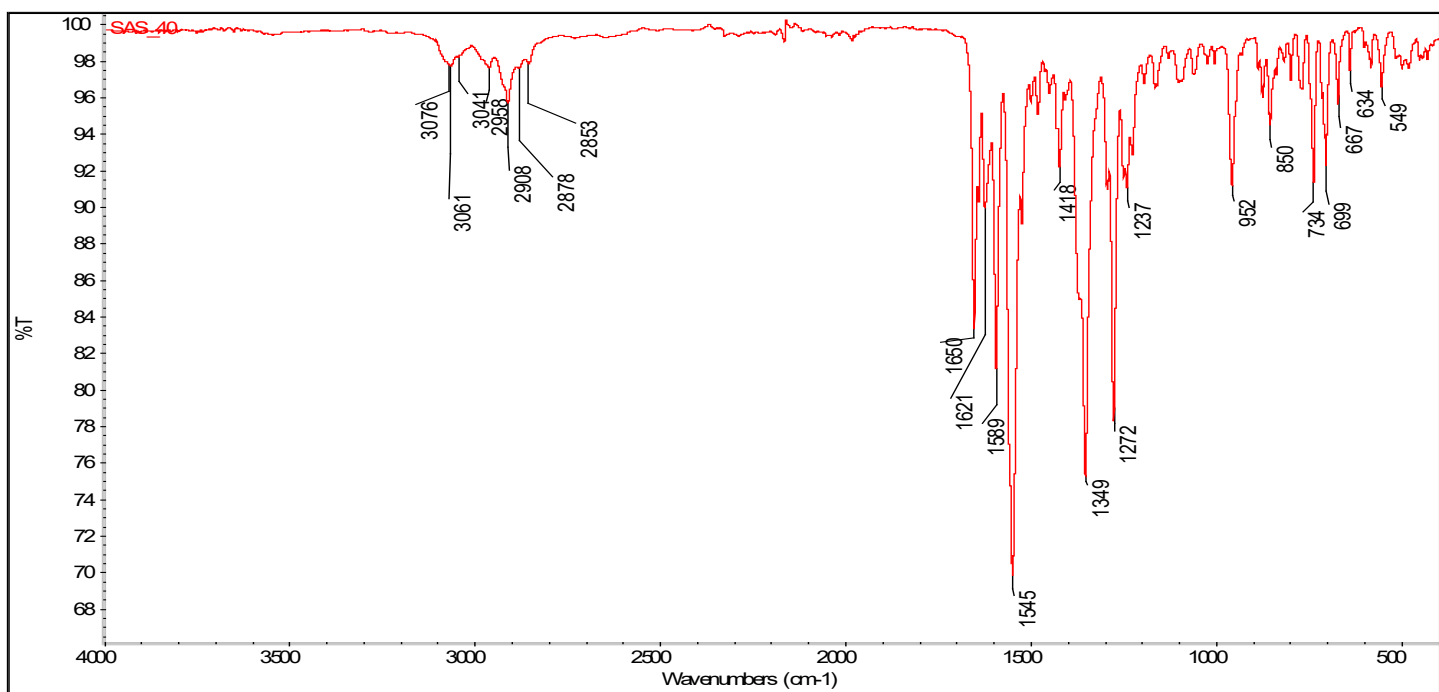

Fig. S9. IR spectrum of complex 1.

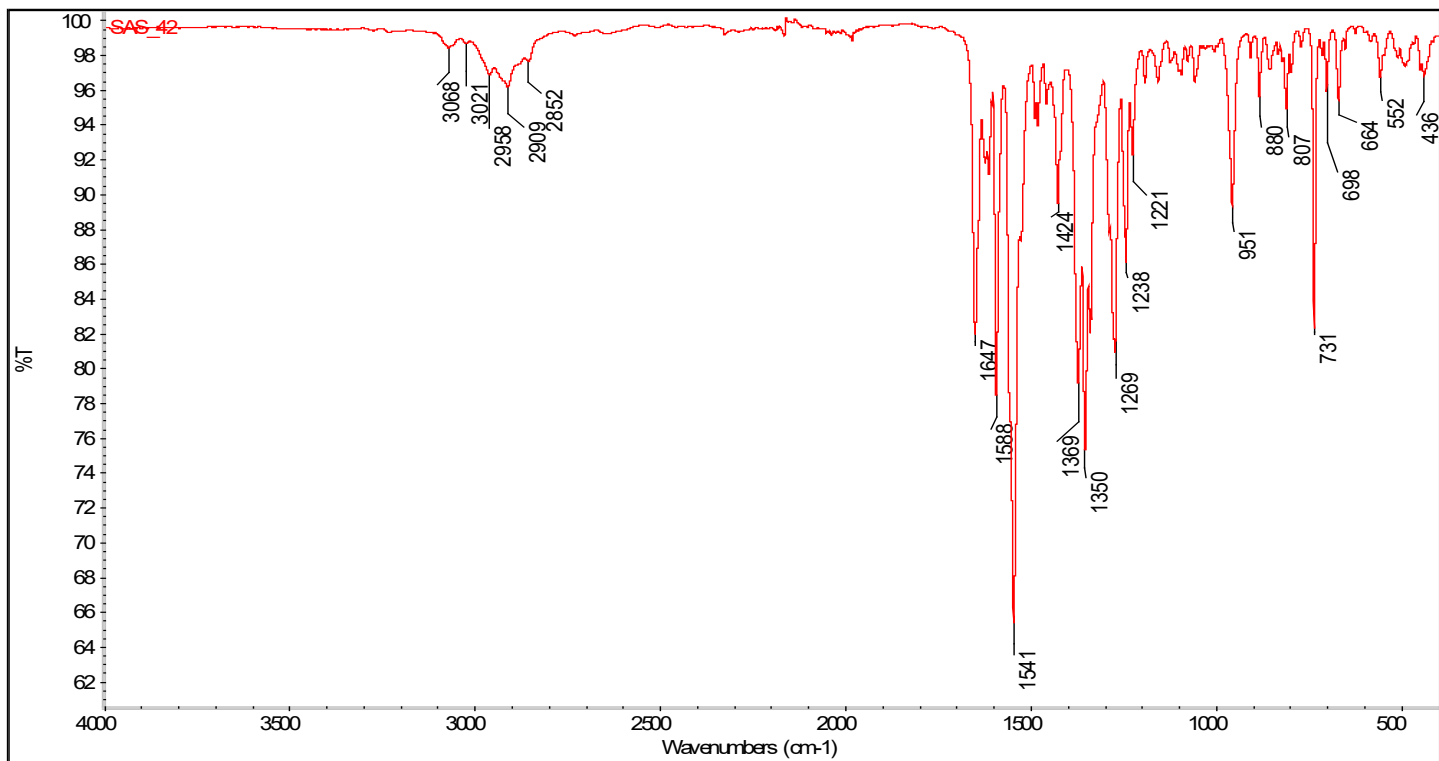

Fig. S10. IR spectrum of complex 2.

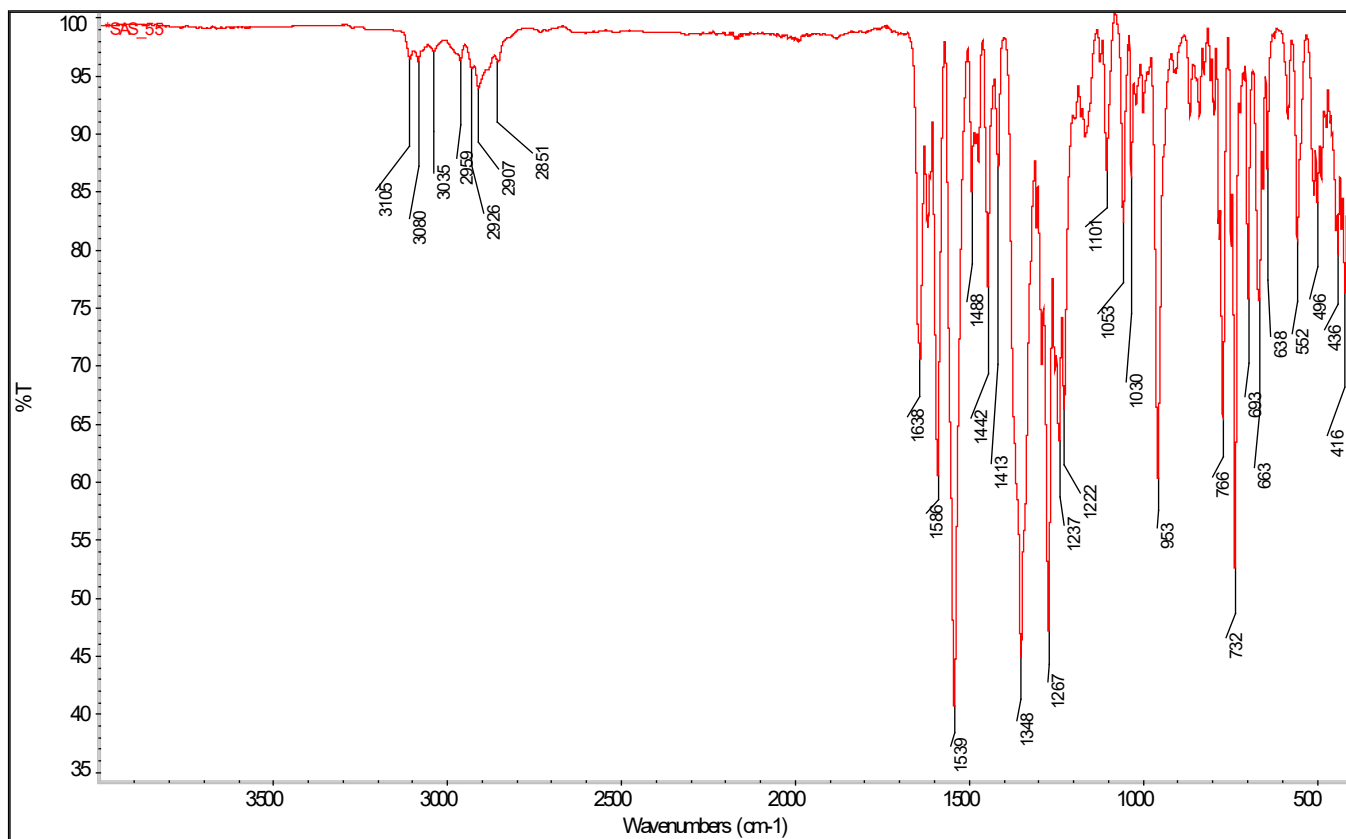

Fig. S11. IR spectrum of complex 3.

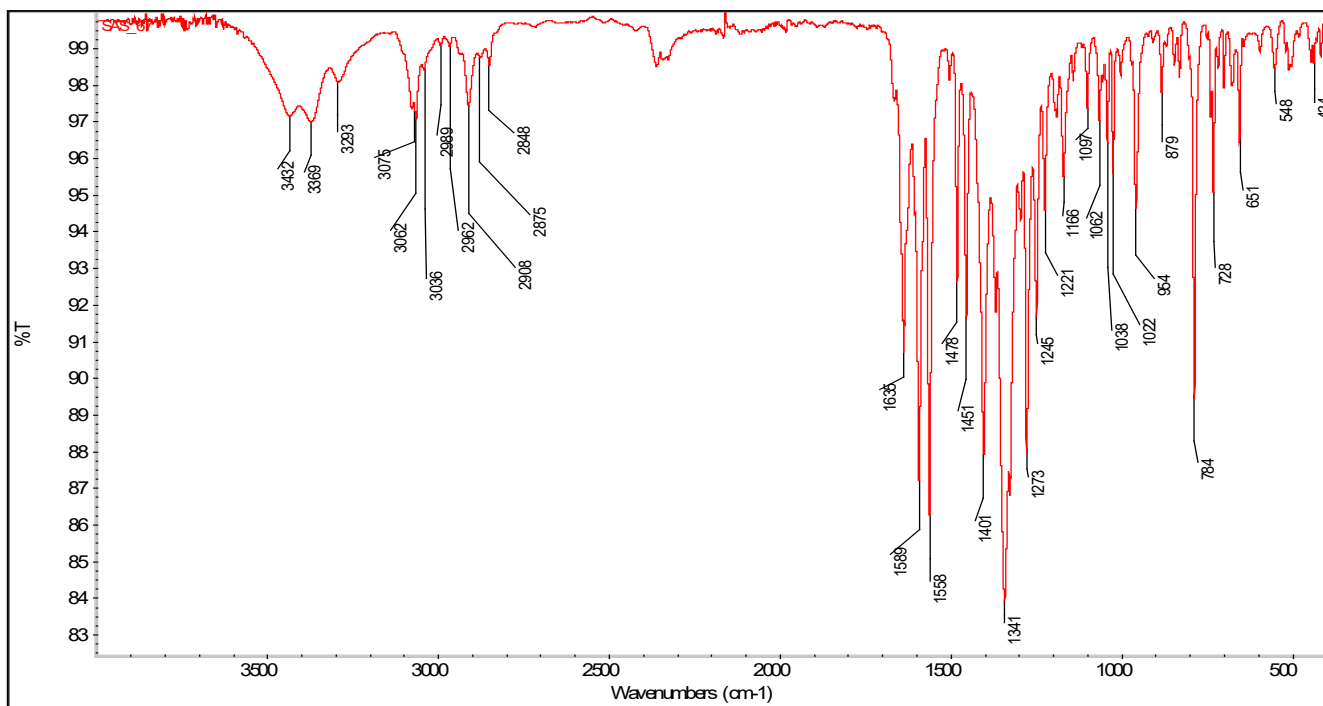

Fig. S12. IR spectrum of complex 4.

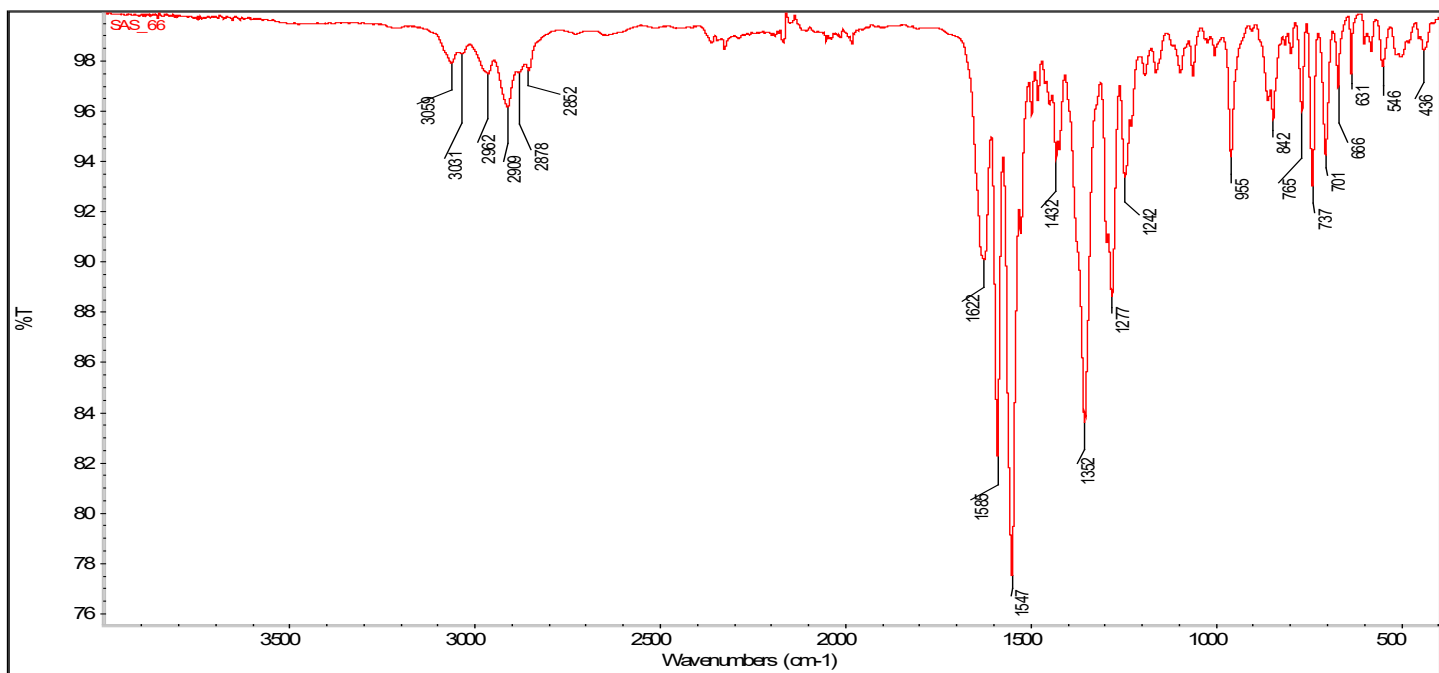

Fig. S13. IR spectrum of complex 5.

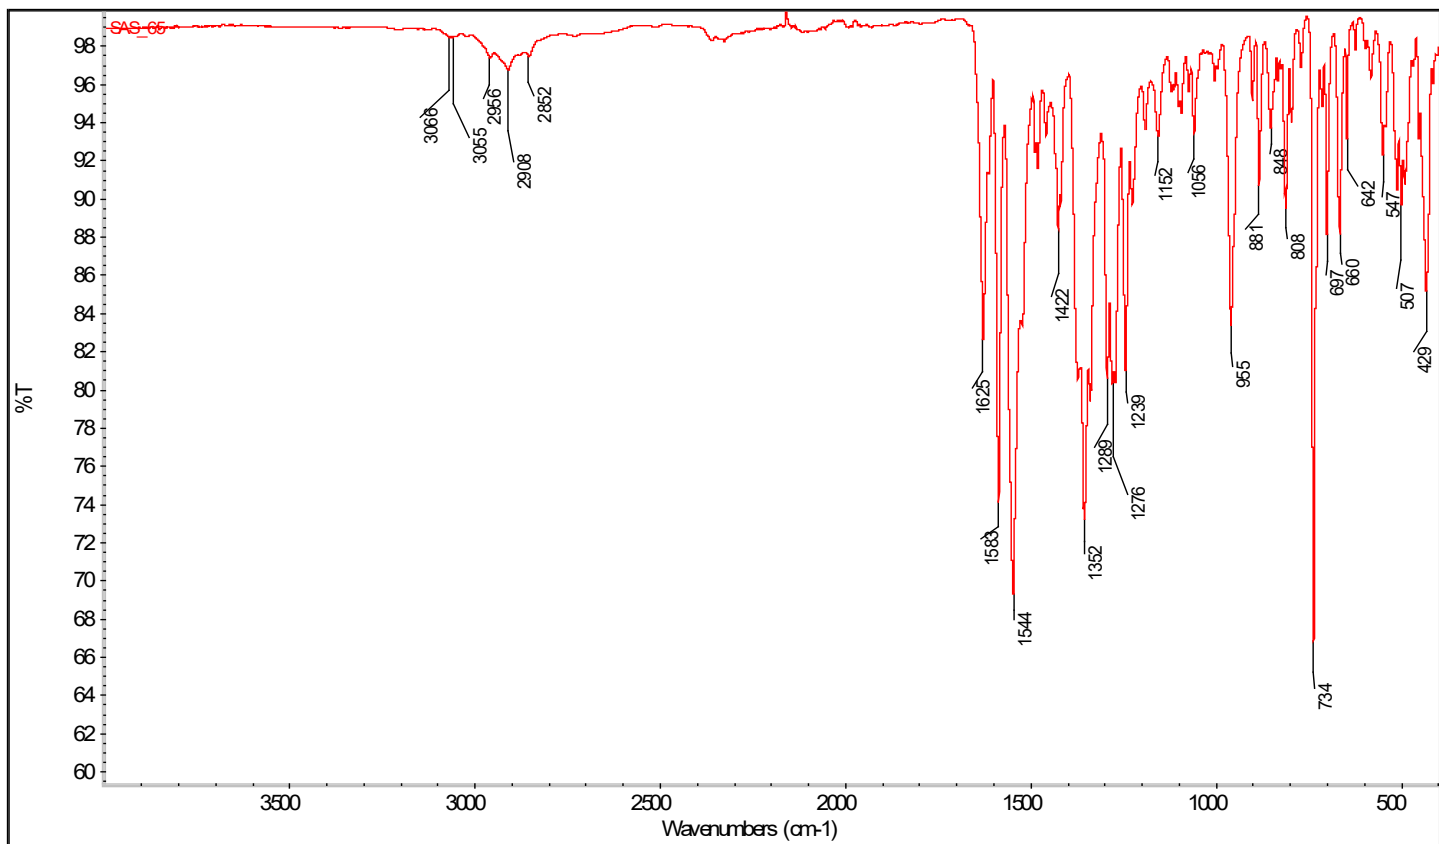

Fig. S14. IR spectrum of complex 6.

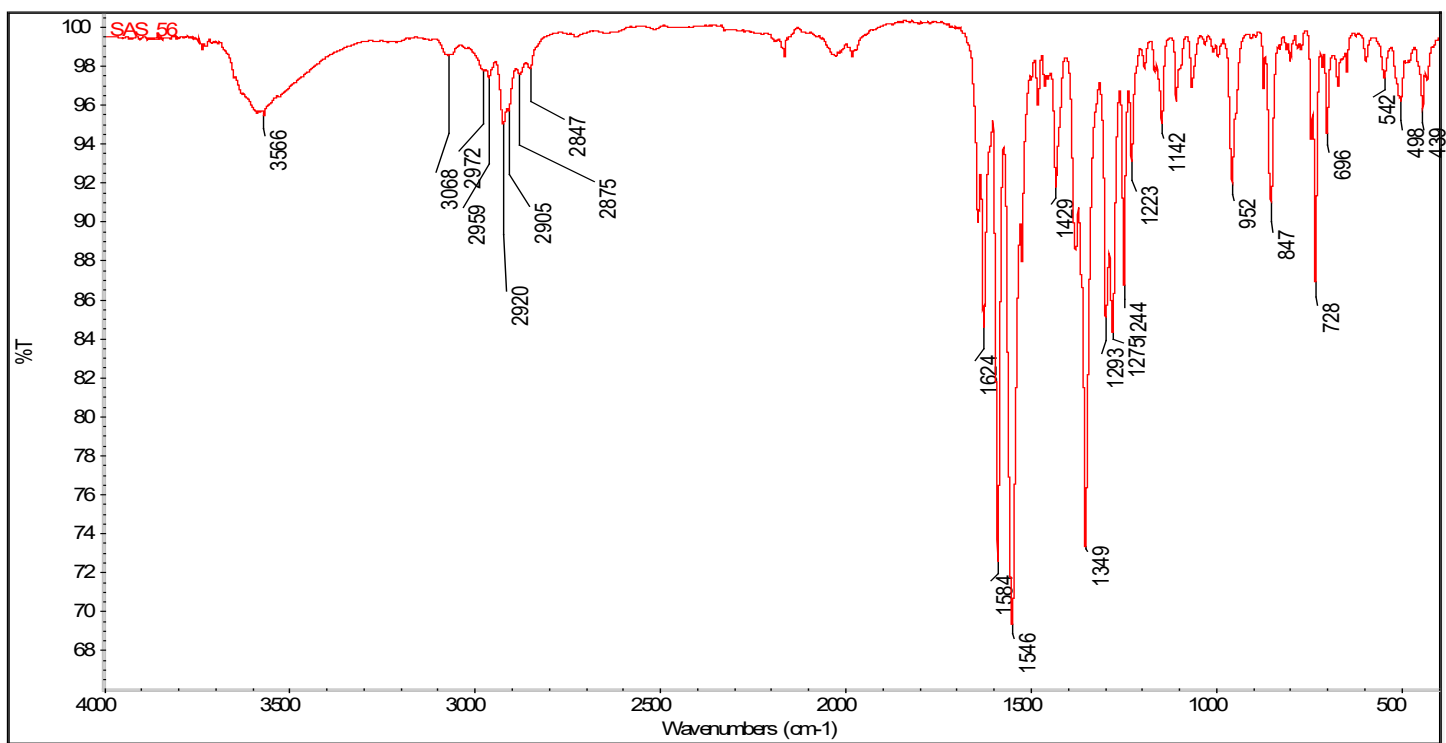

Fig. S15. IR spectrum of complex 7.



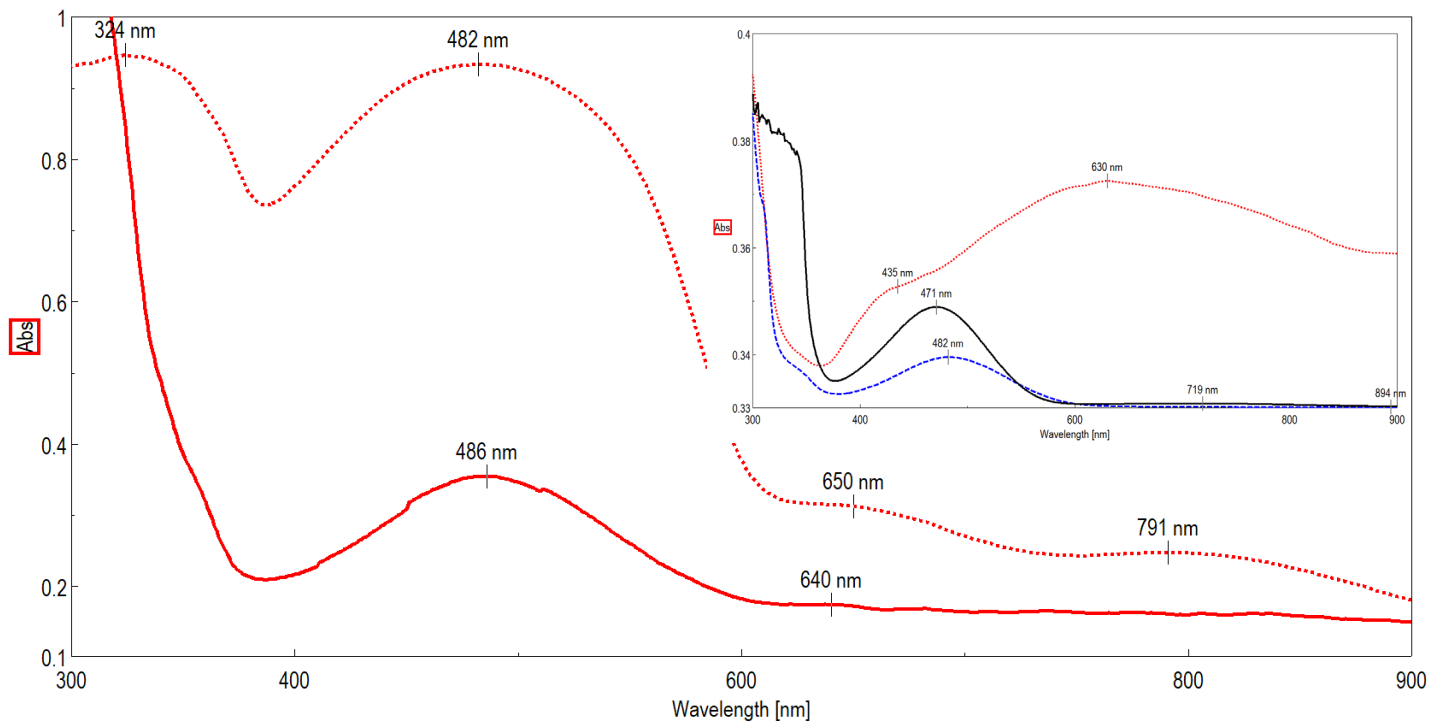

**Fig. S16.** Electronic spectra of complex **1** measured in the solid state (red solid line) and MeOH (red dashed line) together with spectra of complexes **2** (red dotted line), **3** (blue dashed line) and **4** (black full line) measured in MeOH (inset).

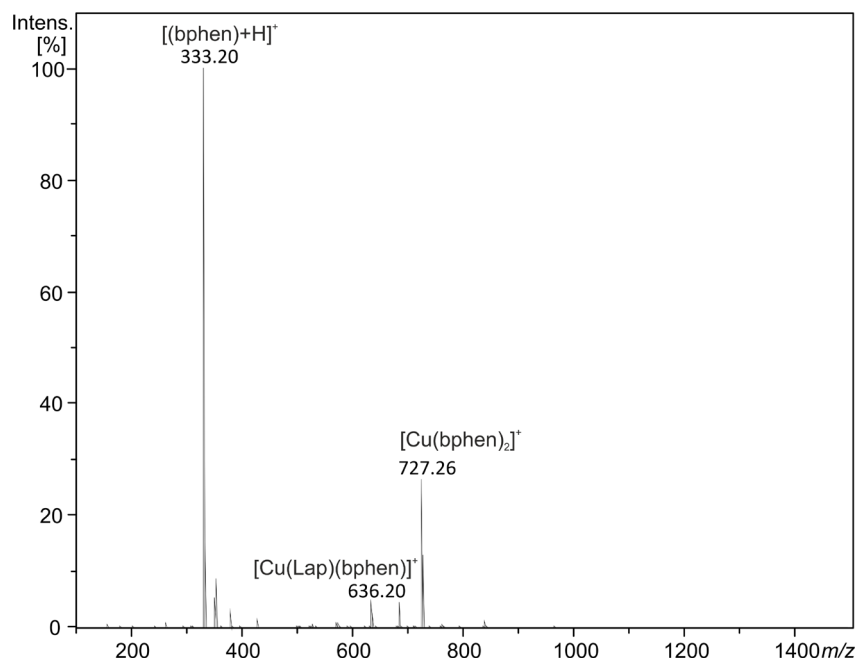

**Fig. S17** ESI-MS spectrum of complex **1** measured in MeOH:H<sub>2</sub>O (1:1) using the positive ionisation mode immediately after the sample preparation. The main peaks represent the following pseudomolecular ions: 333.20 *m/z* [(bphen)+H]<sup>+</sup>; 636.20 *m/z* [Cu(Lap)(bphen)]<sup>+</sup>; 727.26 *m/z* [Cu(bphen)<sub>2</sub>]<sup>+</sup>.

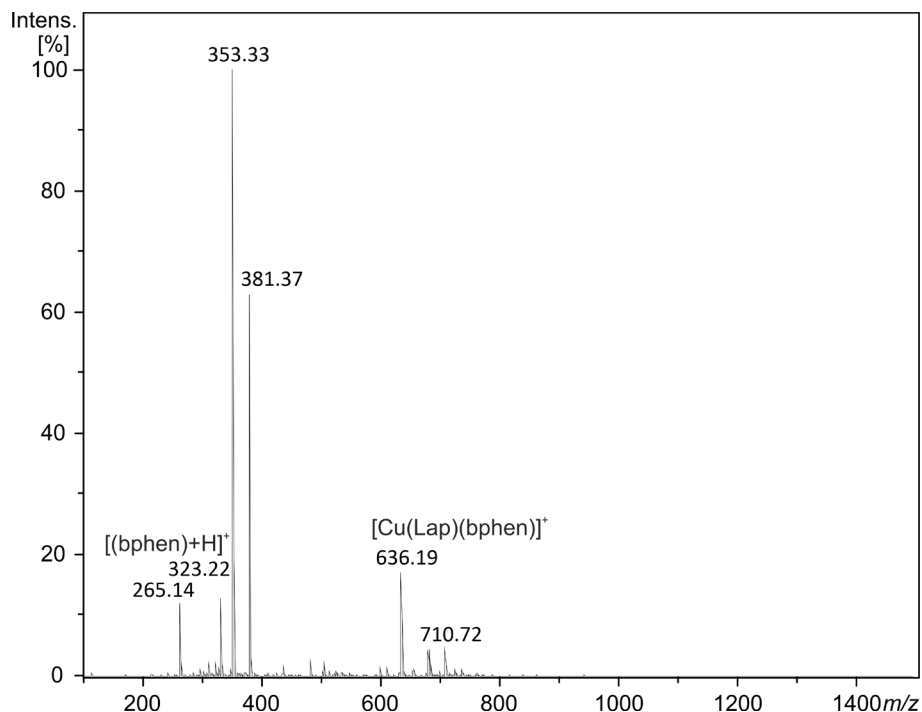

**Fig. S18** ESI-MS spectrum of complex **1** measured in MeOH:H<sub>2</sub>O (1:1) using the positive ionisation mode 24 h after the sample preparation. The main peaks represent the following pseudomolecular ions: 333.22  $m/z$  [(bphen)+H]<sup>+</sup>; 636.19  $m/z$  [Cu(Lap)(bphen)]<sup>+</sup>.

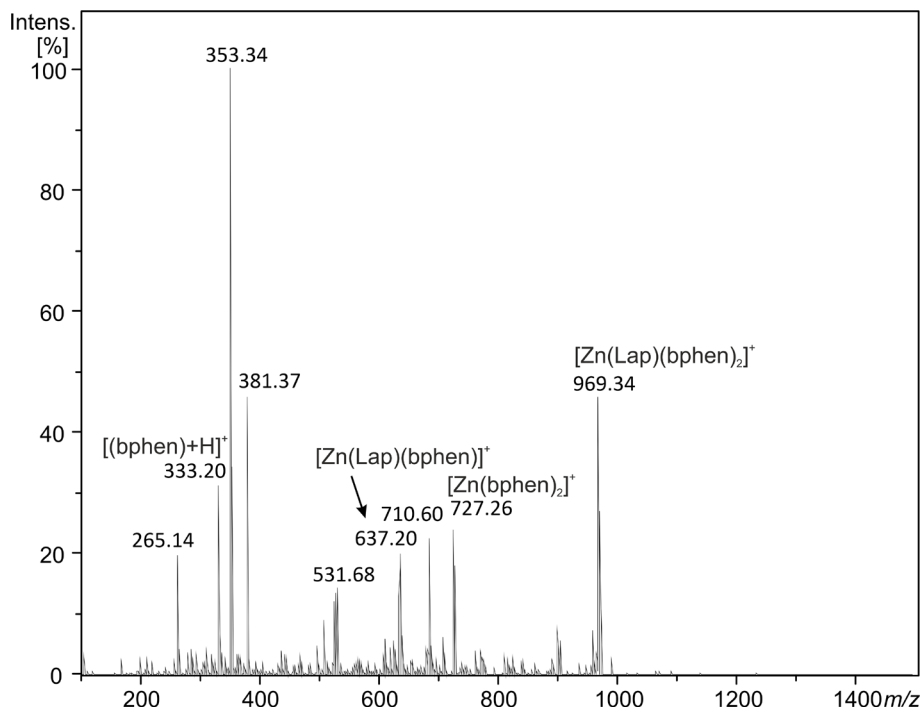

**Fig. S19** ESI-MS spectrum of complex **5** measured in MeOH:H<sub>2</sub>O (1:1) using the positive ionisation mode immediately after the sample preparation. The main peaks represent the following pseudomolecular ions (theor. monoisotopic mass): 333.20  $m/z$  [(bphen)+H]<sup>+</sup>; 637.20  $m/z$  [Zn(Lap)(bphen)]<sup>+</sup>; 727.26  $m/z$  [Zn(bphen)<sub>2</sub>]<sup>+</sup>; 969.34  $m/z$  [Zn(Lap)(bphen)<sub>2</sub>]<sup>+</sup>.

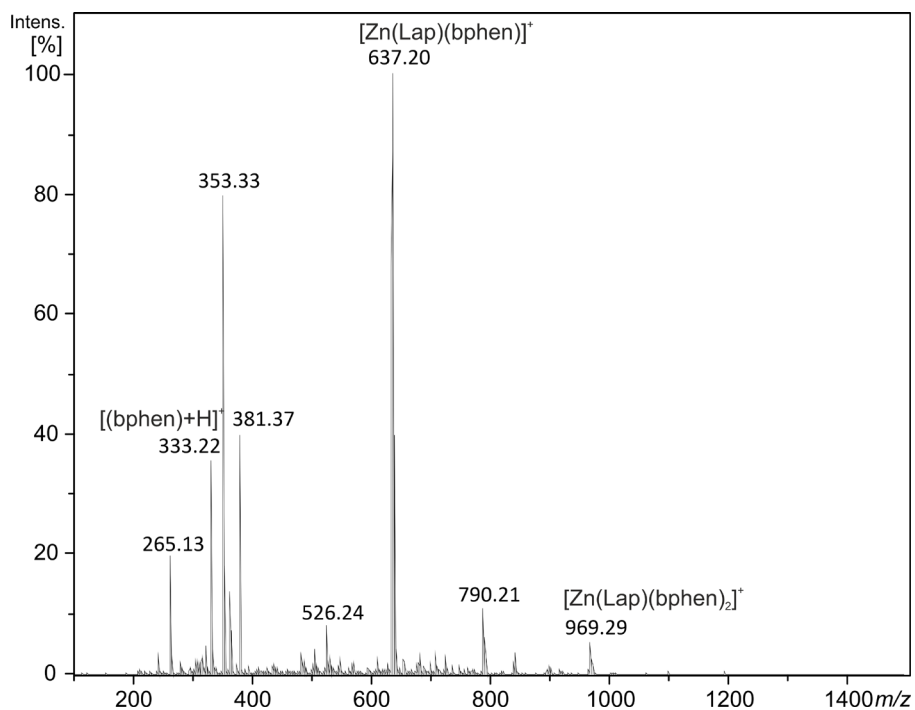

**Fig. S20** ESI-MS spectrum of complex **5** measured in MeOH:H<sub>2</sub>O (1:1) using the positive ionisation mode 24 h after the sample preparation. The main peaks represent the following pseudomolecular ions (theor. monoisotopic mass): 333.22 *m/z* [(bphen)+H]<sup>+</sup>; 637.20 *m/z* [Zn(Lap)(bphen)]<sup>+</sup>; 969.29 *m/z* [Zn(Lap)(bphen)<sub>2</sub>]<sup>+</sup>.

**Table S1** Crystal data and structure refinements for **4**, **5**, and **6**

| Complex                                        | <b>4</b>                                                                                                                        | <b>5</b>                                                                                                                                      | <b>6</b>                                                                                                                      |
|------------------------------------------------|---------------------------------------------------------------------------------------------------------------------------------|-----------------------------------------------------------------------------------------------------------------------------------------------|-------------------------------------------------------------------------------------------------------------------------------|
| Empirical formula                              | C <sub>39</sub> H <sub>26</sub> Cu N <sub>4</sub> O <sub>7</sub>                                                                | C <sub>54</sub> H <sub>42</sub> Zn N <sub>2</sub> O <sub>6</sub>                                                                              | C <sub>43</sub> H <sub>36</sub> Zn N <sub>2</sub> O <sub>6</sub>                                                              |
| Formula weight                                 | 618.09                                                                                                                          | 880.26                                                                                                                                        | 742.11                                                                                                                        |
| Temperature, K                                 | 293(2)                                                                                                                          | 293(2)                                                                                                                                        | 293(2) K                                                                                                                      |
| Wavelength, Å                                  | 0.71073                                                                                                                         | 0.71073                                                                                                                                       | 0.71073                                                                                                                       |
| Crystal system                                 | Monoclinic                                                                                                                      | Triclinic                                                                                                                                     | Monoclinic                                                                                                                    |
| Space group                                    | <i>P</i> 2 <sub>1</sub> / <i>c</i>                                                                                              | <i>P</i> -1                                                                                                                                   | <i>P</i> 2 <sub>1</sub> / <i>n</i>                                                                                            |
| Unit cell dimensions, Å and °                  | <i>a</i> = 8.269(8)<br><i>b</i> = 40.45(5)<br><i>c</i> = 9.081(10)<br>$\alpha$ = 90.0<br>$\beta$ = 112.25(3)<br>$\gamma$ = 90.0 | <i>a</i> = 12.533(6)<br><i>b</i> = 13.657(6)<br><i>c</i> = 14.655(7)<br>$\alpha$ = 104.069(15)<br>$\beta$ = 106.86(2)<br>$\gamma$ = 100.62(3) | <i>a</i> = 10.625(10)<br><i>b</i> = 14.831(16)<br><i>c</i> = 22.80(2)<br>$\alpha$ = 90<br>$\beta$ = 93.00(5)<br>$\gamma$ = 90 |
| Volume, Å <sup>3</sup>                         | 2811(6)                                                                                                                         | 2239.1(19)                                                                                                                                    | 3588(6)                                                                                                                       |
| <i>Z</i>                                       | 4                                                                                                                               | 2                                                                                                                                             | 4                                                                                                                             |
| Density (calculated), g/cm <sup>3</sup>        | 1.461                                                                                                                           | 1.306                                                                                                                                         | 1.374                                                                                                                         |
| Absorption correction                          | Multi-scan                                                                                                                      | Multi-scan                                                                                                                                    | Multi-scan                                                                                                                    |
| Absorption coefficient, mm <sup>-1</sup>       | 0.832                                                                                                                           | 0.602                                                                                                                                         | 0.737                                                                                                                         |
| F(000)                                         | 1276                                                                                                                            | 916                                                                                                                                           | 1544                                                                                                                          |
| Crystal size, mm                               | 0.10 x 0.10 x 0.04                                                                                                              | 0.20 x 0.16 x 0.16                                                                                                                            | 0.14 x 0.12 x 0.12                                                                                                            |
| $\theta$ range for data collection, °          | 2.01 to 26.42                                                                                                                   | 1.89 to 23.54                                                                                                                                 | 2.07 to 23.83                                                                                                                 |
| Index ranges                                   | -9 ≤ <i>h</i> ≤ 10, -45 ≤ <i>k</i> ≤ 45, -9 ≤ <i>l</i> ≤ 9                                                                      | -14 ≤ <i>h</i> ≤ 14, -15 ≤ <i>k</i> ≤ 15, -16 ≤ <i>l</i> ≤ 16                                                                                 | -12 ≤ <i>h</i> ≤ 12, -16 ≤ <i>k</i> ≤ 16, -25 ≤ <i>l</i> ≤ 25                                                                 |
| Reflections collected                          | 32674                                                                                                                           | 40038                                                                                                                                         | 41743                                                                                                                         |
| Independent reflections                        | 4316 [R(int) = 0.0989]                                                                                                          | 6642 [R(int) = 0.0947]                                                                                                                        | 5508 [R(int) = 0.2341]                                                                                                        |
| Completeness to $\theta$                       | 85.6 %                                                                                                                          | 99.6 %                                                                                                                                        | 99.8 %                                                                                                                        |
| Refinement method                              | Full-matrix least-squares on $F^2$                                                                                              | Full-matrix least-squares on $F^2$                                                                                                            | Full-matrix least-squares on $F^2$                                                                                            |
| Data / restraints / parameters                 | 4316 / 0 / 393                                                                                                                  | 6642 / 0 / 554                                                                                                                                | 5508 / 0 / 455                                                                                                                |
| Goodness-of-fit on $F^2$                       | 1.272                                                                                                                           | 1.027                                                                                                                                         | 1.021                                                                                                                         |
| Final R indices [ $I > 2\sigma(I)$ ]           | <i>R</i> 1 = 0.0582, <i>wR</i> 2 = 0.1255                                                                                       | <i>R</i> 1 = 0.0500, <i>wR</i> 2 = 0.1056                                                                                                     | <i>R</i> 1 = 0.0755, <i>wR</i> 2 = 0.1625                                                                                     |
| R indices (all data)                           | <i>R</i> 1 = 0.0828, <i>wR</i> 2 = 0.1341                                                                                       | <i>R</i> 1 = 0.0882, <i>wR</i> 2 = 0.1237                                                                                                     | <i>R</i> 1 = 0.1546, <i>wR</i> 2 = 0.1970                                                                                     |
| Largest diff. peak and hole, e.Å <sup>-3</sup> | 1.419 and -1.369                                                                                                                | 0.615 and -0.666                                                                                                                              | 1.028 and -1.160                                                                                                              |
| CCDC number                                    | 2369949                                                                                                                         | 2369950                                                                                                                                       | 2369951                                                                                                                       |

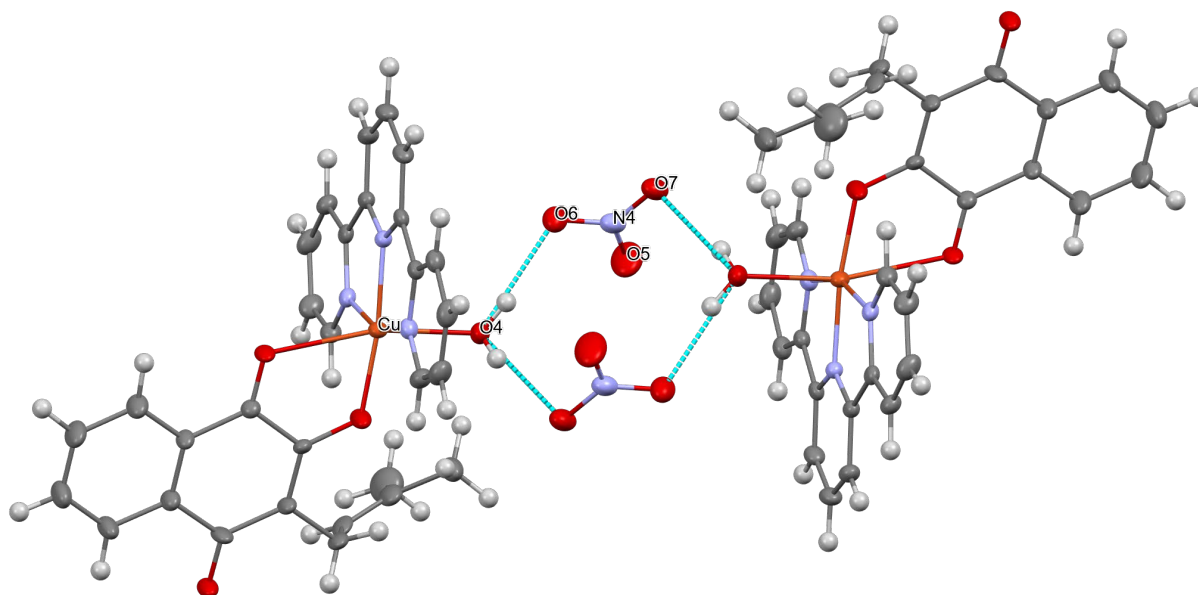

**Fig. S21** The O–H···O hydrogen bonds (cyan dashed lines) connect centrosymmetrically two individual molecules of **4** through the nitrate anions.

**Table S2** Parameters of selected hydrogen bonds [ $\text{\AA}$  and  $^\circ$ ] in complex **4**.

| D–H···A              | d(D–H)  | d(H···A) | d(D···A) | $\angle(\text{DHA})$ |
|----------------------|---------|----------|----------|----------------------|
| O(4)–H(4W)···N(4)    | 0.83(5) | 2.69(5)  | 3.501(7) | 164(5)               |
| O(4)–H(4W)···O(6)    | 0.83(5) | 1.97(5)  | 2.795(6) | 170(5)               |
| O(4)–H(4V)···O(7)#1  | 0.83(6) | 2.07(6)  | 2.873(6) | 162(5)               |
| C(24)–H(24)···O(7)#2 | 0.93    | 2.55     | 3.416(7) | 155.4                |
| C(30)–H(30)···O(6)#3 | 0.93    | 2.20     | 3.120(6) | 169.4                |
| C(30)–H(30)···O(7)#3 | 0.93    | 2.65     | 3.195(7) | 118.3                |

Symmetry transformations used to generate equivalent atoms: #1  $-x+2, -y+1, -z+1$ ; #2  $-x+1, -y+1, -z$ ; #3  $-x+1, -y+1, -z+1$ .

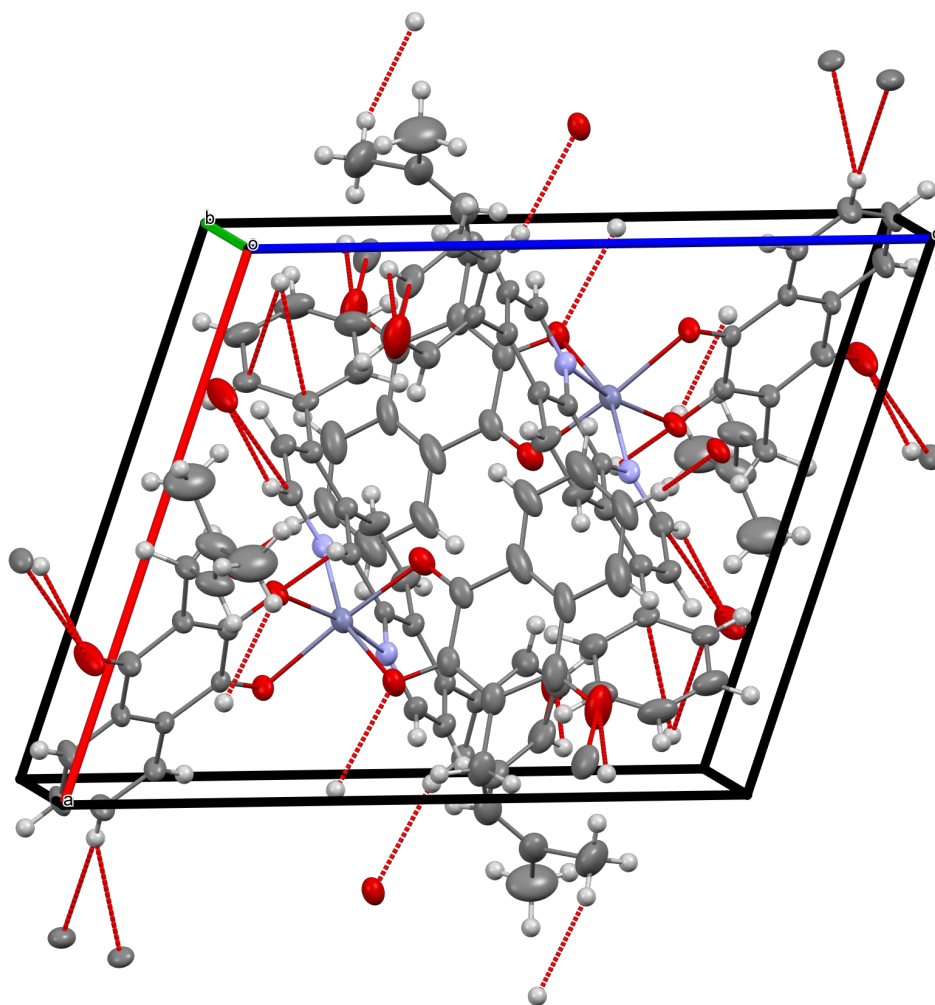

**Fig. S22** Part of the crystal structure of **5**, showing the C–H...C and C–H...O non-covalent contacts (red dotted lines) connecting individual molecules of **5** into a 3D structure.

**Table S3** Parameters of selected hydrogen bonds [ $\text{\AA}$  and  $^\circ$ ] for complex **5**.

| D–H...A               | d(D–H) | d(H...A) | d(D...A) | $\angle(\text{DHA})$ |
|-----------------------|--------|----------|----------|----------------------|
| C(16)–H(16A)...O(6)#1 | 0.93   | 2.48     | 3.190(5) | 133.7                |

Symmetry transformation used to generate equivalent atoms: #1  $-x+1, -y, -z$ .

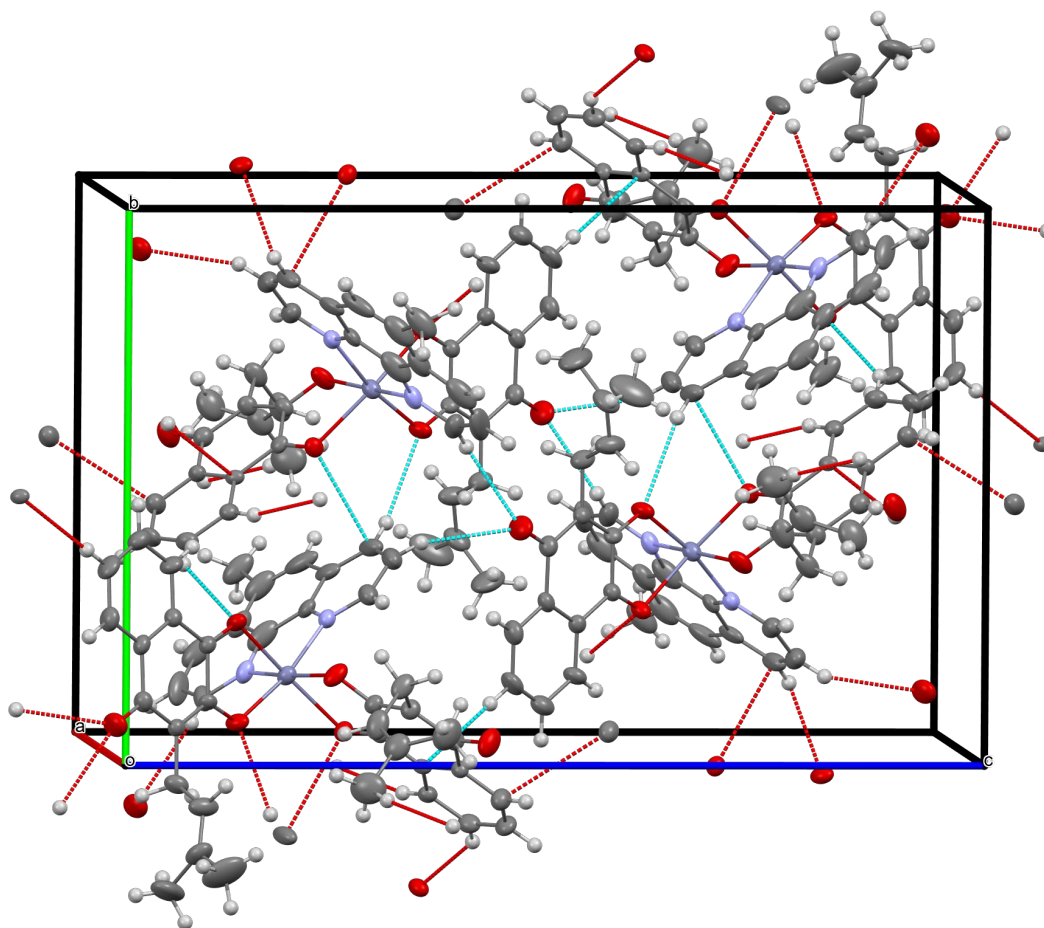

**Fig. S23** Part of the crystal structure of **6**, showing the C–H...C, C–H...O (red dotted lines) and C...O (cyan dotted lines) non-covalent contacts, connecting individual molecules of **6** into a 3D structure.

**Table S4** Parameters of selected hydrogen bonds [ $\text{\AA}$  and  $^\circ$ ] for complex **6**.

| D–H...A               | d(D–H) | d(H...A) | d(D...A)  | $\angle(\text{DHA})$ |
|-----------------------|--------|----------|-----------|----------------------|
| C(26)–H(26A)...O(6)#1 | 0.93   | 2.66     | 3.473(11) | 146.5                |

Symmetry transformation used to generate equivalent atoms: #1  $-x+1, -y+1, -z+1$ .

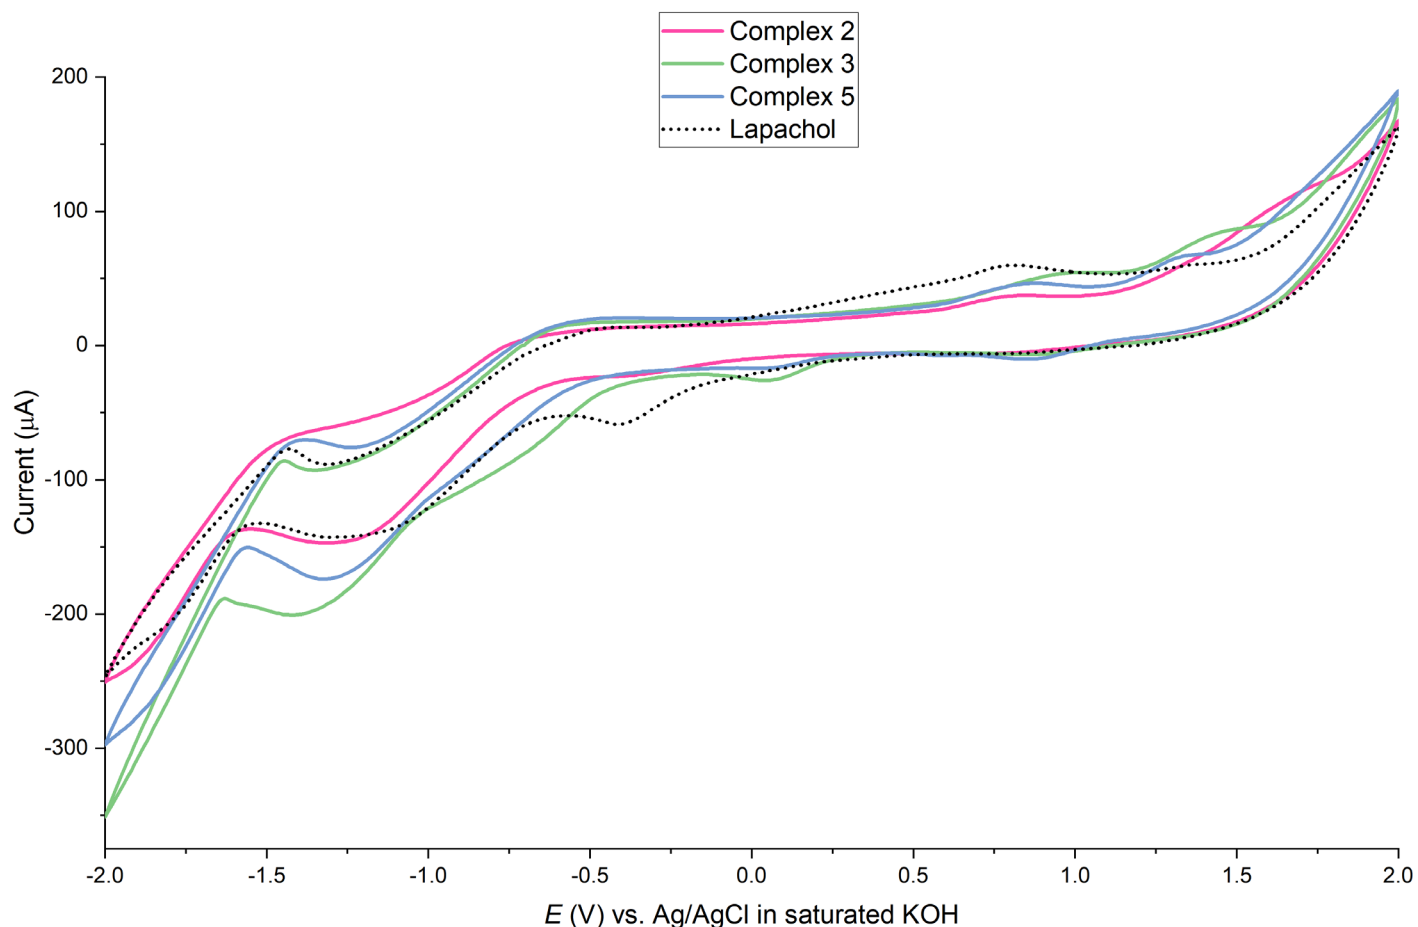

**Fig. S24** The cyclic-voltammograms of complexes **2**, **3**, **5**, and ligand lapachol measured at 0.1 mM concentration in  $\text{CH}_2\text{Cl}_2$  containing 0.1 M  $\text{Bu}_4\text{NPF}_6$  as a supporting electrolyte using the Gamry Series G300 potentiostat (Gamry Instruments, Warminster, PA, USA) equipped with platinum foil working and counter electrode and Ag/AgCl in saturated KOH reference electrode.

**Table S5** The potentials (V) of the maxima/shoulders of the anodic and cathodic waves ( $E_{\text{pa}}$  - anodic,  $E_{\text{pc}}$  - cathodic) vs. reference electrode Ag/AgCl in saturated KOH. The values were obtained by the analysis of the raw data using the Gamry Echem Analyst software (ver. 6.33).

| Compound         | Potentials of the wave maxima/shoulder ( $E_{\text{pa}}$ - anodic, $E_{\text{pc}}$ - cathodic) |                  |                  |                  |                  |                  |                  |
|------------------|------------------------------------------------------------------------------------------------|------------------|------------------|------------------|------------------|------------------|------------------|
|                  | $E_{\text{pa1}}$                                                                               | $E_{\text{pa2}}$ | $E_{\text{pa3}}$ | $E_{\text{pa4}}$ | $E_{\text{pc1}}$ | $E_{\text{pc2}}$ | $E_{\text{pc3}}$ |
| Lapachol         | 1.350                                                                                          | 0.810            | -0.400           | -1.440           | 0.850            | -0.420           | -1.310           |
| Complex <b>2</b> | 1.340                                                                                          | 0.880            | -0.380           | -1.390           | 0.850            | 0.020            | -1.330           |
| Complex <b>3</b> | 1.450                                                                                          | 1.030            | -0.548           | -1.450           | 0.850            | 0.040            | -1.420           |
| Complex <b>5</b> | 0.840                                                                                          | -0.690           | -1.430           | -                | 0.630            | -0.390           | -1.310           |
